# Supplementary material
Source: MDPI journal article supplement (https://www.mdpi.com/2304-6740/10/9/132)
Supplement: s1 [file s1]

Archive with 4 entries (4 files):
- Data S1. D2CO3_short_wavelength.cif
- Data S1. D2CO3_short_wavelength_CHECKCIF.pdf
- Data S2. D2CO3_long_wavelength.cif
- Data S2. D2CO3_long_wavelength_CHECKCIF.pdf
