# Supplementary material
Source: MDPI journal article supplement (https://www.mdpi.com/2304-6740/10/9/132)
Supplement: s1 [file s1 › Data S1. D2CO3_short_wavelength.cif]

data_D2CO3_Complete_W2
_gsas_GSASII_version  5278
_pd_block_id
   2022-05-25T09:48|D2CO3_Complete_W2|SebastianBenz|STRESS-SPEC
_audit_creation_method  "created in GSAS-II"
_audit_creation_date  2022-05-25T09:48
_audit_author_name  "Sebastian Benz"
_audit_update_record
   "2022-05-25T09:48  Initial software-generated CIF"

# Standard version of Publication_Template template follows
#=============================================================================
# this information describes the project, paper etc. for the CIF             #
# Acta Cryst. Section C papers and editorial correspondence is generated     #
# from the information in this section                                       #
#                                                                            #
#   (from)   CIF submission form for Rietveld refinements (Acta Cryst. C)    #
#                                                 Version 14 December 1998   #
#=============================================================================
# 1. SUBMISSION DETAILS

_publ_contact_author_name            ?   # Name of author for correspondence
_publ_contact_author_address             # Address of author for correspondence
; ?
;
_publ_contact_author_email           ?
_publ_contact_author_fax             ?
_publ_contact_author_phone           ?

_publ_contact_letter
; ?
;
   
_publ_requested_journal              ?
_publ_requested_coeditor_name        ?
_publ_requested_category             ?   # Acta C: one of CI/CM/CO/FI/FM/FO

#==============================================================================

# 2. PROCESSING SUMMARY (IUCr Office Use Only)

_journal_data_validation_number      ?

_journal_date_recd_electronic        ?
_journal_date_to_coeditor            ?
_journal_date_from_coeditor          ?
_journal_date_accepted               ?
_journal_date_printers_first         ?
_journal_date_printers_final         ?
_journal_date_proofs_out             ?
_journal_date_proofs_in              ?
_journal_coeditor_name               ?
_journal_coeditor_code               ?
_journal_coeditor_notes
; ?
;
_journal_techeditor_code             ?
_journal_techeditor_notes
; ?
;
_journal_coden_ASTM                  ?
_journal_name_full                   ?
_journal_year                        ?
_journal_volume                      ?
_journal_issue                       ?
_journal_page_first                  ?
_journal_page_last                   ?
_journal_paper_category              ?
_journal_suppl_publ_number           ?
_journal_suppl_publ_pages            ?

#==============================================================================

# 3. TITLE AND AUTHOR LIST

_publ_section_title
; ?
;
_publ_section_title_footnote
; ?
;         
 
# The loop structure below should contain the names and addresses of all 
# authors, in the required order of publication. Repeat as necessary.

loop_
	_publ_author_name
        _publ_author_footnote
	_publ_author_address
 ?                                   #<--'Last name, first name' 
; ?
;
; ?
;

#==============================================================================

# 4. TEXT

_publ_section_synopsis
;  ?
;
_publ_section_abstract                         
; ?
;          
_publ_section_comment                          
; ?
;
_publ_section_exptl_prep      # Details of the preparation of the sample(s)
                              # should be given here. 
; ?
;
_publ_section_exptl_refinement                  
; ?
;
_publ_section_references
; ?
;
_publ_section_figure_captions
; ?
;
_publ_section_acknowledgements
; ?
;

#=============================================================================
# 5. OVERALL REFINEMENT & COMPUTING DETAILS

_refine_special_details
; ?
;
_pd_proc_ls_special_details
; ?
;

# The following items are used to identify the programs used.
_computing_molecular_graphics     ?
_computing_publication_material   ?

_refine_ls_weighting_scheme       ?        
_refine_ls_weighting_details      ?
_refine_ls_hydrogen_treatment     ?        
_refine_ls_extinction_method      ?        
_refine_ls_extinction_coef        ?         
_refine_ls_number_constraints     ?        

_refine_ls_restrained_S_all       ?        
_refine_ls_restrained_S_obs       ?

#==============================================================================
# 6. SAMPLE PREPARATION DATA

# (In the unusual case where multiple samples are used in a single
#  Rietveld study, this information should be moved into the phase
#  blocks)

# The following three fields describe the preparation of the material.
# The cooling rate is in K/min.  The pressure at which the sample was  
# prepared is in kPa.  The temperature of preparation is in K.
               
_pd_prep_cool_rate                ?        
_pd_prep_pressure                 ?        
_pd_prep_temperature              ?        

_pd_char_colour                   ?       # use ICDD colour descriptions

_pd_proc_info_datetime  2022-05-25T09:48
_pd_calc_method  "Rietveld Refinement"
_computing_structure_refinement
   "GSAS-II (Toby & Von Dreele, J. Appl. Cryst. 46, 544-549, 2013)"
_refine_ls_matrix_type  full
_refine_ls_number_parameters  26
_refine_ls_goodness_of_fit_all  0.116
_refine_ls_shift/su_max  0.0327

# OVERALL WEIGHTED R-FACTOR
_refine_ls_wR_factor_obs  0.02662

# Standard version of Phase_Template template follows
#==============================================================================
# 7. CHEMICAL, STRUCTURAL AND CRYSTAL DATA

_pd_char_particle_morphology      ?

_chemical_name_systematic
; ?
;
_chemical_name_common             ?
_chemical_formula_moiety          ?        
_chemical_formula_structural      ?        
_chemical_formula_analytical      ?
_chemical_melting_point           ?
_chemical_compound_source         ?       # for minerals and 
                                          # natural products
_symmetry_space_group_name_Hall   "-P 2ybc"

_exptl_crystal_F_000               ?
_exptl_crystal_density_meas        ?
_exptl_crystal_density_method      ?

_cell_special_details
; ?
;

_geom_special_details             ?

# The following item identifies the program(s) used (if appropriate).
_computing_structure_solution     ?        

#==============================================================================

# 8. Phase information from GSAS-II


# phase info for D$_2$CO$_3$ follows
_pd_phase_name  D$_2$CO$_3$
_cell_length_a  5.3917(22)
_cell_length_b  6.661(4)
_cell_length_c  5.6900(12)
_cell_angle_alpha  90
_cell_angle_beta   92.657(28)
_cell_angle_gamma  90
_cell_volume  204.12(12)
_exptl_crystal_density_diffrn  2.0837
_symmetry_cell_setting  monoclinic
_symmetry_space_group_name_H-M  "P 21/c"
loop_
    _space_group_symop_id
    _space_group_symop_operation_xyz
     1  x,y,z
     2  -x,1/2+y,1/2-z
     3  -x,-y,-z
     4  x,1/2-y,1/2+z

# ATOMIC COORDINATES AND DISPLACEMENT PARAMETERS
loop_ 
   _atom_site_label
   _atom_site_type_symbol
   _atom_site_fract_x
   _atom_site_fract_y
   _atom_site_fract_z
   _atom_site_occupancy
   _atom_site_adp_type
   _atom_site_U_iso_or_equiv
   _atom_site_site_symmetry_multiplicity
C1     C    0.302(6)    0.174(4)    0.591(6)    1.0000     Uiso 0.0400     4   
O1     O    0.204(8)    0.004(6)    0.667(6)    1.0000     Uiso 0.0560     4   
O2     O    0.212(11)   0.350(6)    0.660(9)    1.0000     Uiso 0.0560     4   
O3     O    0.494(6)    0.170(6)    0.452(7)    1.0000     Uiso 0.0560     4   
D1     D    0.284(12)   -0.119(5)   0.608(9)    1.0000     Uiso 0.0820     4   
D2     D    0.295(11)   0.469(5)    0.595(10)   1.0000     Uiso 0.0820     4   

loop_  _atom_type_symbol _atom_type_number_in_cell
        _atom_type_scat_Cromer_Mann_a1 _atom_type_scat_Cromer_Mann_a2 _atom_type_scat_Cromer_Mann_a3
        _atom_type_scat_Cromer_Mann_a4 _atom_type_scat_Cromer_Mann_b1 _atom_type_scat_Cromer_Mann_b2
        _atom_type_scat_Cromer_Mann_b3 _atom_type_scat_Cromer_Mann_b4 _atom_type_scat_Cromer_Mann_c
        _atom_type_scat_length_neutron _atom_type_scat_source
  C       4      2.31       1.02       1.5886     0.865      20.8439    10.2075    0.5687     51.6512    0.2156     0.6648
      https://subversion.xray.aps.anl.gov/pyGSAS/trunk/atmdata.py
  D       8      0.493      0.3229     0.1402     0.0408     10.5109    26.1257    3.1424     57.7997    0.003      0.6674
      https://subversion.xray.aps.anl.gov/pyGSAS/trunk/atmdata.py
  O       12     3.0485     2.2868     1.5463     0.867      13.2771    5.7011     0.3239     32.9089    0.2508     0.5805
      https://subversion.xray.aps.anl.gov/pyGSAS/trunk/atmdata.py

# Note that Z affects _cell_formula_sum and _weight
_cell_formula_units_Z  4
_chemical_formula_sum  "C D2 O3"
_chemical_formula_weight  64.04

# MOLECULAR GEOMETRY
loop_
   _geom_bond_atom_site_label_1
   _geom_bond_atom_site_label_2
   _geom_bond_distance
   _geom_bond_site_symmetry_1
   _geom_bond_site_symmetry_2
   _geom_bond_publ_flag
  C1     O1     1.332(15)    1_555    1_555 yes
  C1     O2     1.335(15)    1_555    1_555 yes
  C1     O3     1.336(16)    1_555    1_555 yes
  O1     C1     1.332(15)    1_555    1_555 yes
  O1     D1     0.991(16)    1_555    1_555 yes
  O2     C1     1.335(15)    1_555    1_555 yes
  O2     D2     0.989(16)    1_555    1_555 yes
  O3     C1     1.336(16)    1_555    1_555 yes
  O3     D1     1.30(6)      1_555    3_656 yes
  D1     O1     0.991(16)    1_555    1_555 yes
  D1     O3     1.30(6)      1_555    3_656 yes
  D2     O2     0.989(16)    1_555    1_555 yes

loop_
   _geom_angle_atom_site_label_1
   _geom_angle_atom_site_label_2
   _geom_angle_atom_site_label_3
   _geom_angle
   _geom_angle_site_symmetry_1
   _geom_angle_site_symmetry_2
   _geom_angle_site_symmetry_3
   _geom_angle_publ_flag
  O1     C1     O2     119.7(10)     1_555  1_555    1_555 yes
  O1     C1     O3     120.4(10)     1_555  1_555    1_555 yes
  O2     C1     O3     119.9(10)     1_555  1_555    1_555 yes
  C1     O1     D1     113.9(12)     1_555  1_555    1_555 yes
  C1     O2     D2     114.3(12)     1_555  1_555    1_555 yes
  C1     O3     D1     155(5)        1_555  1_555    3_656 yes
  O1     D1     O3     136(5)        1_555  1_555    3_656 yes
_pd_proc_ls_pref_orient_corr
   "March-Dollase correction coef. = 1.000 axis = [0, 0, 1]"
_pd_proc_ls_profile_function
;
Finger-Cox-Jephcoat function parameters U, V, W, X, Y, SH/L:
  peak variance(Gauss) = Utan(Th)^2^+Vtan(Th)+W:
  peak HW(Lorentz) = X/cos(Th)+Ytan(Th); SH/L = S/L+H/L
  U, V, W in (centideg)^2^, X & Y in centideg
    0.000, 0.000, 263.032, 0.000, 0.000, 0.001, 

;

# Standard version of Instrument_Template template follows
#==============================================================================
# 9. INSTRUMENT CHARACTERIZATION

_exptl_special_details
; ?
;

# if regions of the data are excluded, the reason(s) are supplied here:
_pd_proc_info_excluded_regions
; ?
;

# The following item is used to identify the equipment used to record 
# the powder pattern when the diffractogram was measured at a laboratory 
# other than the authors' home institution, e.g. when neutron or synchrotron
# radiation is used.

_pd_instr_location
; ?
;
_pd_calibration_special_details           # description of the method used
                                          # to calibrate the instrument
; ?
;

_diffrn_source                    ?       
_diffrn_source_target             ?
_diffrn_source_type               ?
_diffrn_measurement_device_type   "STRESS_SPEC"       
_diffrn_detector                  ?       
_diffrn_detector_type             ?       # make or model of detector

_pd_meas_scan_method              ?       # options are 'step', 'cont',
                                          # 'tof', 'fixed' or
                                          # 'disp' (= dispersive)
_pd_meas_special_details
;  ?
;

# The following two items identify the program(s) used (if appropriate).
_computing_data_collection        ?        
_computing_data_reduction         ?                   

# Describe any processing performed on the data, prior to refinement.
# For example: a manual Lp correction or a precomputed absorption correction
_pd_proc_info_data_reduction      ?

# The following item is used for angular dispersive measurements only.

_diffrn_radiation_monochromator   ?        

# The following items are used to define the size of the instrument.
# Not all distances are appropriate for all instrument types.

_pd_instr_dist_src/mono           ?
_pd_instr_dist_mono/spec          ?
_pd_instr_dist_src/spec           ?
_pd_instr_dist_spec/anal          ?
_pd_instr_dist_anal/detc          ?
_pd_instr_dist_spec/detc          ?

# 10. Specimen size and mounting information

# The next three fields give the specimen dimensions in mm.  The equatorial 
# plane contains the incident and diffracted beam.

_pd_spec_size_axial               ?       # perpendicular to 
                                          # equatorial plane

_pd_spec_size_equat               ?       # parallel to 
                                          # scattering vector 
                                          # in transmission

_pd_spec_size_thick               ?       # parallel to 
                                          # scattering vector 
                                          # in reflection

_pd_spec_mounting                         # This field should be
                                          # used to give details of the 
                                          # container.
; ?
;

_pd_spec_mount_mode               ?       # options are 'reflection' 
                                          # or 'transmission'
    
_pd_spec_shape                    ?       # options are 'cylinder' 
                                          # 'flat_sheet' or 'irregular'


_diffrn_radiation_wavelength  1.35100
_refine_ls_R_F_factor        0.27807
_refine_ls_R_Fsqd_factor     0.27442
_pd_proc_ls_prof_R_factor     0.02062
_pd_proc_ls_prof_wR_factor    0.02569
_gsas_proc_ls_prof_R_B_factor   0.02585
_gsas_proc_ls_prof_wR_B_factor  0.03055
_pd_proc_ls_prof_wR_expected  0.22622
_diffrn_radiation_probe  neutron
_pd_proc_ls_background_function
;
Background function: "chebyschev" function with 12 terms:
    18.001, 0.553, 4.395, 11.268, -4.838, -54.299, 13.343, 102.543, 
    -19.060, -87.771, 7.107, 28.143, 
;
_diffrn_ambient_temperature  298
_cell_measurement_temperature 298
_diffrn_ambient_pressure  1.85e6

# STRUCTURE FACTOR TABLE
loop_
   _refln_index_h
   _refln_index_k
   _refln_index_l
   _refln_F_squared_meas
   _refln_F_squared_calc
   _refln_phase_calc
   _refln_d_spacing
   _gsas_i100_meas
  0    2    1    5.7108     8.0226     -180.0  2.87343  11.19  
  0    0    2    3.9900     4.1723     0.0     2.84193  3.82   
  1    2    0    2.4282     1.8426     -0.0    2.83257  4.63   
  2    0    0    56.3426    50.2662    180.0   2.69298  48.67  
  0    1    2    1.1498     1.9798     180.0   2.61394  1.88   
  1    0    -2   56.5016    41.9350    0.0     2.56300  44.37  
  1    2    -1   4.2984     3.1479     -180.0  2.56024  6.74   
  1    2    1    1.6149     1.7874     -180.0  2.51088  2.44   
  2    1    0    0.0638     0.0756     0.0     2.49664  0.10   
  1    0    2    137.0601   137.6698   180.0   2.46674  100.00 
  1    1    -2   0.6548     0.7095     -0.0    2.39202  0.90   
  2    1    -1   0.4891     0.3384     -180.0  2.32289  0.64   
  1    1    2    3.1799     0.8028     180.0   2.31320  4.10   
  2    1    1    0.0454     0.0108     0.0     2.25051  0.06   
  0    2    2    5.3840     1.7868     180.0   2.16181  6.11   
  2    2    0    1.6463     6.3605     180.0   2.09403  1.76   
  0    3    1    19.4706    15.0968    0.0     2.06805  20.33  
  1    3    0    0.0055     0.0024     -0.0    2.05266  0.01   
  1    2    -2   4.6466     4.3409     -0.0    2.03114  4.69   
  2    0    -2   0.0252     0.0038     0.0     2.00163  0.01   
  2    2    -1   10.0691    3.3742     -180.0  1.98831  9.77   
  1    2    2    2.6631     0.8713     180.0   1.98222  2.57   
  2    2    1    0.6723     0.5700     0.0     1.94234  0.62   
  1    3    -1   13.3543    11.9957    -180.0  1.94161  12.39  
  1    3    1    8.0580     8.3612     -180.0  1.91982  7.32   
  2    1    -2   3.4190     3.2267     180.0   1.91695  3.10   
  2    0    2    8.2640     5.4955     -0.0    1.91103  3.72   
  2    1    2    7.6691     11.2437    -0.0    1.83692  6.42   
  0    1    3    0.2801     0.2914     0.0     1.82233  0.23   
  3    0    0    0.0154     0.0072     180.0   1.79532  0.01   
  1    1    -3   0.0280     0.1309     0.0     1.75005  0.02   
  0    3    2    0.0004     0.0020     -0.0    1.74960  0.00   
  3    1    0    1.6459     1.4834     -0.0    1.73345  1.24   
  2    2    -2   0.0563     0.0147     -0.0    1.71561  0.04   
  2    3    0    0.8060     0.2605     180.0   1.71309  0.59   
  1    1    3    2.4073     0.8786     0.0     1.70330  1.76   
  3    1    -1   3.3068     1.8208     0.0     1.67916  2.35   
  1    3    -2   0.4239     0.2617     -0.0    1.67814  0.30   
  0    4    0    2.4705     2.1727     -180.0  1.66517  0.86   
  2    2    2    0.3183     0.4852     180.0   1.65753  0.22   
  2    3    -1   4.3527     6.4529     -180.0  1.65374  3.01   
  1    3    2    0.0125     0.0156     -0.0    1.65023  0.01   
  0    2    3    1.9644     2.1902     -180.0  1.64678  1.35   
  3    1    1    0.0192     0.0187     -0.0    1.63773  0.01   
  2    3    1    7.2623     6.2278     0.0     1.62701  4.88   
  0    4    1    3.5885     0.1768     180.0   1.59801  2.33   
  1    2    -3   9.6015     0.9058     0.0     1.59286  6.21   
  1    4    0    10.5914    1.0328     0.0     1.59087  6.83   
  3    2    0    0.0468     0.0022     -0.0    1.58032  0.03   
  1    2    3    9.4327     6.9050     0.0     1.55737  5.86   
  3    0    -2   23.2969    14.2963    -180.0  1.55062  7.18   
  2    1    -3   2.4199     0.8897     -180.0  1.54148  1.48   
  3    2    -1   0.0006     0.0002     -180.0  1.53885  0.00   
  1    4    -1   15.2720    4.7923     180.0   1.53747  9.28   
  1    4    1    9.7144     2.4493     180.0   1.52658  5.83   
  3    1    -2   0.3551     0.5292     -0.0    1.51024  0.21   
  3    2    1    2.2674     4.3672     0.0     1.50678  1.33   
  3    0    2    6.2167     30.4162    0.0     1.48702  1.78   
  2    3    -2   0.0117     0.0576     -0.0    1.48666  0.01   
  2    1    3    0.6829     1.7992     -180.0  1.47895  0.39   
  3    1    2    0.8727     1.2121     180.0   1.45129  0.48   
  2    3    2    0.0012     0.0015     180.0   1.44839  0.00   
  0    3    3    6.4837     7.0666     0.0     1.44120  3.52   
  0    4    2    1.0832     0.7865     -180.0  1.43671  0.58   
  2    2    -3   1.7224     0.8390     0.0     1.43081  0.92   
  0    0    4    14.7613    17.4776    -180.0  1.42097  3.91   
  2    4    0    0.0064     0.0100     0.0     1.41629  0.00   
  3    2    -2   0.0624     0.0914     0.0     1.40572  0.03   
  1    3    -3   6.8686     9.6836     0.0     1.40465  3.57   
  1    4    -2   0.2465     0.0799     -180.0  1.39635  0.13   
  3    3    0    0.0130     0.0040     180.0   1.39602  0.01   
  1    0    -4   0.9058     0.1338     0.0     1.38994  0.23   
  0    1    4    5.8194     0.8524     -0.0    1.38969  2.97   
  2    4    -1   1.8834     0.4667     0.0     1.38219  0.95   
  2    2    3    0.1312     0.0420     180.0   1.38039  0.07   
  1    4    2    3.8770     1.2868     0.0     1.38014  1.96   
  1    3    3    25.1891    8.3843     -180.0  1.38012  12.70  
  3    3    -1   3.1938     4.1681     0.0     1.36719  1.59   
  2    4    1    4.9503     5.8656     -0.0    1.36647  2.45   
  1    1    -4   4.4138     2.5373     -0.0    1.36063  2.17   
  1    0    4    0.2924     0.1302     180.0   1.35851  0.07   
  3    2    2    5.2403     2.1948     -0.0    1.35781  2.57   
  4    0    0    22.6040    16.9144    0.0     1.34649  5.47   
  3    3    1    3.8844     2.3415     0.0     1.34455  1.88   
  1    1    4    2.6423     0.3435     -0.0    1.33110  1.25   
  4    1    0    0.2921     0.0119     -180.0  1.31979  0.14   
  3    1    -3   0.5530     0.1009     0.0     1.30842  0.26   
  0    2    4    2.5509     0.4827     180.0   1.30697  1.18   
  4    1    -1   1.9091     0.3240     -180.0  1.29865  0.87   
  0    5    1    6.6826     1.1880     180.0   1.29699  3.04   
  1    5    0    2.3920     0.6908     0.0     1.29317  1.08   
  2    3    -3   13.3619    5.3547     -180.0  1.28974  6.02   
  1    2    -4   1.0045     0.3859     180.0   1.28270  0.45   
  2    0    -4   6.3796     2.7194     0.0     1.28150  1.42   
  2    4    -2   0.2425     0.1216     0.0     1.28012  0.11   
  4    1    1    0.3740     0.8766     -180.0  1.27291  0.17   
  3    3    -2   0.1667     0.5476     180.0   1.27127  0.07   
  1    5    -1   0.0057     0.0510     -180.0  1.26399  0.00   
  2    1    -4   0.2678     1.2073     180.0   1.25842  0.12   
  1    5    1    0.3794     1.6011     -0.0    1.25792  0.16   
  1    2    4    0.1597     0.6704     -0.0    1.25788  0.07   
  2    4    2    0.1116     0.3683     -180.0  1.25544  0.05   
  2    3    3    0.2675     0.8627     0.0     1.25244  0.12   
  3    1    3    0.0205     0.0602     -180.0  1.25134  0.01   
  0    4    3    0.7322     1.9467     180.0   1.25075  0.31   
  4    2    0    0.0175     0.0268     -180.0  1.24832  0.01   
  4    0    -2   4.8052     4.3445     0.0     1.23925  1.02   
  3    2    -3   5.0232     4.5222     -180.0  1.23869  2.12   
  3    3    2    0.1368     0.1196     -0.0    1.23551  0.06   
  2    0    4    40.1573    32.7123    -0.0    1.23337  8.43   
  4    2    -1   3.9380     2.6326     0.0     1.23039  1.65   
  1    4    -3   0.1801     0.0646     -180.0  1.22663  0.07   
  3    4    0    0.4429     0.0662     -180.0  1.22087  0.18   
  4    1    -2   3.2630     0.6357     180.0   1.21834  1.34   
  2    1    4    1.1361     0.7150     -0.0    1.21275  0.46   
  1    4    3    0.2256     0.1953     180.0   1.21020  0.09   
  4    2    1    0.2460     0.2142     -180.0  1.20843  0.10   
  0    5    2    0.0789     0.0508     0.0     1.20620  0.03   
  3    4    -1   20.1275    5.7450     -0.0    1.20145  8.11   
  0    3    4    0.6384     0.1481     -0.0    1.19683  0.26   
  2    2    -4   0.1808     0.0435     -180.0  1.19601  0.07   
  4    0    2    0.4486     0.1099     180.0   1.19557  0.09   
  2    5    0    0.2823     0.0687     0.0     1.19403  0.11   
  3    2    3    0.2042     0.0450     0.0     1.18992  0.08   
  3    4    1    1.8830     0.8942     180.0   1.18600  0.74   
  1    5    -2   0.9918     0.8307     -180.0  1.18201  0.39   
  1    3    -4   0.1127     0.0708     180.0   1.17812  0.04   
  4    1    2    0.8796     0.4130     180.0   1.17676  0.34   
  2    5    -1   1.9096     0.5411     180.0   1.17339  0.74   
  1    5    2    0.5614     0.1310     0.0     1.17213  0.22   
  2    5    1    0.0767     0.0468     0.0     1.16373  0.03   
  4    2    -2   2.2565     1.5326     180.0   1.16145  0.86   
  1    3    4    0.0030     0.0013     -180.0  1.15879  0.00   
  2    2    4    0.3733     0.1624     -0.0    1.15660  0.14   
  4    3    0    0.4312     0.3388     -0.0    1.15131  0.16   
  2    4    -3   6.1655     7.7772     180.0   1.14787  2.32   
  3    3    -3   13.4058    15.6103    -180.0  1.14374  5.02   
  3    0    -4   2.5845     1.8625     -180.0  1.14022  0.48   
  4    3    -1   30.4688    15.9561    0.0     1.13720  11.31  
  3    4    -2   2.9467     0.8466     0.0     1.13479  1.09   
  4    2    2    0.1545     0.0342     -0.0    1.12525  0.06   
  3    1    -4   4.7662     1.8542     -0.0    1.12387  1.74   
  2    4    3    3.0816     2.9705     -0.0    1.12134  1.12   
  0    1    5    0.0077     0.0094     0.0     1.12057  0.00   
  4    3    1    1.5327     2.2568     -180.0  1.11979  0.56   
  0    6    0    25.1075    16.7273    0.0     1.11011  4.50   
  2    3    -4   0.6080     0.4069     -0.0    1.10989  0.22   
  3    4    2    0.0228     0.0154     -180.0  1.10914  0.01   
  2    5    -2   0.7812     0.5295     0.0     1.10899  0.28   
  1    1    -5   0.0393     0.0260     -0.0    1.10721  0.01   
  4    1    -3   0.4873     0.3194     -180.0  1.10678  0.17   
  3    3    3    0.9929     0.6328     -180.0  1.10502  0.35   
_reflns_number_total  152
_reflns_limit_h_min  0
_reflns_limit_h_max  4
_reflns_limit_k_min  0
_reflns_limit_k_max  6
_reflns_limit_l_min  -5
_reflns_limit_l_max  5
_reflns_d_resolution_low    2.873
_reflns_d_resolution_high   1.105

# POWDER DATA TABLE
_pd_meas_number_of_points  932

loop_
   _pd_meas_2theta_scan
   _pd_meas_intensity_total
   _pd_calc_intensity_total
   _pd_proc_intensity_bkg_calc
   _pd_proc_ls_weight
  22.44120   18.0839      0            0           0         
  22.49820   18.489       0            0           0         
  22.55520   18.6089      0            0           0         
  22.61230   18.4176      0            0           0         
  22.66930   18.3572      0            0           0         
  22.72640   18.1139      0            0           0         
  22.78340   18.1686      0            0           0         
  22.84040   17.7827      0            0           0         
  22.89750   17.7295      0            0           0         
  22.95450   17.9302      0            0           0         
  23.01150   17.2986      0            0           0         
  23.06860   17.6388      0            0           0         
  23.12560   17.5819      0            0           0         
  23.18270   17.2843      0            0           0         
  23.23970   18.1816      0            0           0         
  23.29670   18.2631      0            0           0         
  23.35380   17.4133      0            0           0         
  23.41080   18.0021      0            0           0         
  23.46780   17.7378      0            0           0         
  23.52490   18.5513      0            0           0         
  23.58190   17.4446      0            0           0         
  23.63900   18.0074      0            0           0         
  23.69600   17.3441      0            0           0         
  23.75300   17.6986      0            0           0         
  23.81010   18.0898      0            0           0         
  23.86710   18.2295      0            0           0         
  23.92410   17.5508      0            0           0         
  23.98120   18.3401      0            0           0         
  24.03820   17.5808      0            0           0         
  24.09520   17.9141      0            0           0         
  24.15230   17.9824      0            0           0         
  24.20930   18.805       0            0           0         
  24.26640   18.2113      0            0           0         
  24.32340   18.8643      0            0           0         
  24.38040   18.7979      0            0           0         
  24.43750   18.2768      0            0           0         
  24.49450   18.5627      0            0           0         
  24.55150   18.6101      0            0           0         
  24.60860   19.3663      0            0           0         
  24.66560   20.7173      0            0           0         
  24.72270   23.2265      0            0           0         
  24.77970   25.6877      0            0           0         
  24.83670   26.9092      0            0           0         
  24.89380   29.1053      0            0           0         
  24.95080   28.7747      0            0           0         
  25.00780   29.0077      0            0           0         
  25.06490   28.3167      0            0           0         
  25.12190   27.1062      0            0           0         
  25.17900   25.1228      0            0           0         
  25.23600   24.638       0            0           0         
  25.29300   21.8559      0            0           0         
  25.35010   20.9956      0            0           0         
  25.40710   19.4727      0            0           0         
  25.46410   20.1671      0            0           0         
  25.52120   19.2931      0            0           0         
  25.57820   18.5923      0            0           0         
  25.63530   18.7688      0            0           0         
  25.69230   18.4459      0            0           0         
  25.74930   18.2276      0            0           0         
  25.80640   19.2852      0            0           0         
  25.86340   18.6542      0            0           0         
  25.92040   18.045       0            0           0         
  25.97750   18.6088      0            0           0         
  26.03450   18.9071      18.51581018  18.51124659 0.05289018 
  26.09160   18.4784      18.54383701  18.5390311  0.05411724 
  26.14860   18.6444      18.57111322  18.56603815 0.05363541 
  26.20560   18.9254      18.59771416  18.59233749 0.05283904 
  26.26270   19.1355      18.62371096  18.61799315 0.05225889 
  26.31970   18.3447      18.64904032  18.64293423 0.05451166 
  26.37670   19.245       18.67377826  18.66722452 0.05196155 
  26.43380   19.0297      18.69800671  18.69092254 0.05254944 
  26.49080   19.1739      18.72171253  18.71396218 0.05215423 
  26.54790   19.057       18.7451611   18.73644062 0.05247416 
  26.60490   19.2601      18.76879368  18.75829477 0.05192081 
  26.66190   19.2388      18.79409417  18.77957955 0.05197829 
  26.71900   19.1723      18.82466075  18.8003453  0.05215858 
  26.77600   19.6602      18.86783981  18.82053319 0.05086418 
  26.83300   18.6042      18.93671871  18.84019343 0.0537513 
  26.89010   19.0495      19.04966187  18.85937199 0.05249482 
  26.94710   19.4371      19.22400672  18.87801402 0.051448  
  27.00410   19.4962      19.4658271   18.89616541 0.05129205 
  27.06120   19.0036      19.75701468  18.91386809 0.05262161 
  27.11820   19.3289      20.04877205  18.931071   0.051736  
  27.17530   19.8722      20.27736871  18.94784502 0.05032155 
  27.23230   19.6509      20.38875357  18.96414146 0.05088825 
  27.28930   19.1548      20.37221525  18.97999974 0.05220624 
  27.34640   19.22        20.26512733  18.99545583 0.05202914 
  27.40340   18.6547      20.12716849  19.01046449 0.05360579 
  27.46040   19.5149      20.00327203  19.02506169 0.0512429 
  27.51750   18.4679      19.90537894  19.03928016 0.05414801 
  27.57450   19.8854      19.8187852   19.05307797 0.05028815 
  27.63160   20.6434      19.72254879  19.06651108 0.04844163 
  27.68860   19.6373      19.60936092  19.07953967 0.0509235 
  27.74560   19.5488      19.48838356  19.09219454 0.05115404 
  27.80270   19.4884      19.37699256  19.10450358 0.05131258 
  27.85970   20.1657      19.29010165  19.11643006 0.04958915 
  27.91670   19.3593      19.23301844  19.12800197 0.05165476 
  27.97380   19.0756      19.20275111  19.13924457 0.05242299 
  28.03080   18.6599      19.19208283  19.15012414 0.05359086 
  28.08790   18.6637      19.19340158  19.16068428 0.05357994 
  28.14490   19.0314      19.20111909  19.1708932  0.05254474 
  28.20190   18.7871      19.21210166  19.18077468 0.05322801 
  28.25900   18.7096      19.22538178  19.19035001 0.0534485 
  28.31600   19.0742      19.24221391  19.19959025 0.05242684 
  28.37300   19.4813      19.2678556   19.2085169  0.05133128 
  28.43010   18.9433      19.31570439  19.21714906 0.05278911 
  28.48710   18.8173      19.41379873  19.22546061 0.05314259 
  28.54420   19.8182      19.61308726  19.23348467 0.05045867 
  28.60120   20.1479      19.98707386  19.24119695 0.04963296 
  28.65820   20.4593      20.61971074  19.24861544 0.04887753 
  28.71530   21.5891      21.57063781  19.25575592 0.04631967 
  28.77230   22.8825      22.81877798  19.26259681 0.04370152 
  28.82930   25.1492      24.23288458  19.26915418 0.0397627 
  28.88640   25.9393      25.56760934  19.27544199 0.03855154 
  28.94340   26.7259      26.51718108  19.2814413  0.03741689 
  29.00050   27.2682      26.84849964  19.28717619 0.03667275 
  29.05750   27.7171      26.48698678  19.29262948 0.03607881 
  29.11450   26.7524      25.53349044  19.29781428 0.03737982 
  29.17160   25.033       24.21948375  19.30274174 0.03994727 
  29.22860   22.6306      22.83580995  19.30739727 0.04418796 
  29.28560   21.7269      21.616297    19.31179235 0.04602589 
  29.34270   20.8258      20.68736534  19.31593656 0.04801736 
  29.39970   20.6009      20.07053606  19.31981787 0.04854157 
  29.45680   19.72        19.70906929  19.32345235 0.05070994 
  29.51380   19.0279      19.52430445  19.32682966 0.05255441 
  29.57080   18.7869      19.44488429  19.32995873 0.05322858 
  29.62790   19.6112      19.4240232   19.3328467  0.05099127 
  29.68490   19.3459      19.43718726  19.33548573 0.05169054 
  29.74190   20.2561      19.47302996  19.33788332 0.04936784 
  29.79900   18.7598      19.5241232   19.34004527 0.05330547 
  29.85600   19.3622      19.58020954  19.34196618 0.05164702 
  29.91300   19.0814      19.62764726  19.3436522  0.05240706 
  29.97010   19.171       19.65329786  19.34510782 0.05216212 
  30.02710   18.8788      19.65229548  19.34633006 0.05296947 
  30.08420   18.5907      19.63555686  19.34732533 0.05379034 
  30.14120   18.7391      19.63163633  19.34809224 0.05336436 
  30.19820   19.8522      19.68392305  19.34863483 0.05037225 
  30.25530   20.1506      19.84490854  19.34895555 0.04962631 
  30.31230   19.7329      20.16091872  19.34905535 0.05067679 
  30.36930   21.0617      20.64885503  19.34893707 0.04747955 
  30.42640   21.62        21.26756285  19.34860201 0.04625347 
  30.48340   23.0773      21.89952257  19.34805344 0.04333263 
  30.54050   23.6601      22.38046298  19.34729151 0.04226525 
  30.59750   23.7338      22.55466046  19.346321   0.042134  
  30.65450   23.2085      22.36103212  19.34514285 0.04308766 
  30.71160   23.0479      21.86656346  19.34375656 0.0433879 
  30.76860   21.7001      21.22876997  19.34216911 0.04608274 
  30.82560   21.0593      20.61037733  19.34038037 0.04748496 
  30.88270   20.3654      20.12135307  19.33838883 0.04910289 
  30.93970   20.7025      19.80211405  19.33620363 0.04830335 
  30.99680   19.5935      19.63418517  19.33381926 0.05103733 
  31.05380   19.6675      19.57444171  19.33124628 0.0508453 
  31.11080   19.4293      19.57601655  19.32848287 0.05146866 
  31.16790   19.243       19.60177158  19.32552592 0.05196695 
  31.22490   20.0451      19.62950777  19.32238801 0.0498875 
  31.28190   19.0016      19.65903921  19.3190664  0.05262715 
  31.33900   19.6949      19.72198487  19.31555704 0.05077457 
  31.39600   19.8827      19.88964148  19.31187452 0.05029498 
  31.45310   19.5         20.27356495  19.30800824 0.05128205 
  31.51010   20.9067      20.99983483  19.30397408 0.04783156 
  31.56710   21.806       22.15572766  19.29976778 0.04585894 
  31.62420   24.5715      23.70770009  19.29538386 0.04069756 
  31.68120   25.864       25.42484335  19.2908401  0.03866378 
  31.73820   26.7227      26.91131938  19.28613135 0.03742137 
  31.79530   27.1866      27.72494562  19.28125137 0.03678283 
  31.85230   26.6461      27.5865886   19.27621971 0.03752894 
  31.90940   26.1492      26.56133358  19.27102118 0.03824209 
  31.96640   25.7712      25.03200407  19.26567649 0.038803  
  32.02340   23.0945      23.49697776  19.26017918 0.04330035 
  32.08050   22.2881      22.38426168  19.25452174 0.04486699 
  32.13750   22.5804      21.94746954  19.24872653 0.0442862 
  32.19450   22.2558      22.2261394   19.24278634 0.04493211 
  32.25160   23.532       23.07473919  19.23669296 0.04249533 
  32.30860   25.0562      24.18938738  19.23047033 0.03991028 
  32.36570   26.2422      25.18104122  19.22409925 0.03810656 
  32.42270   26.5092      25.67056609  19.21760467 0.03772275 
  32.47970   25.9564      25.45123613  19.2109782  0.03852614 
  32.53680   25.2117      24.5852733   19.20421053 0.03966412 
  32.59380   23.767       23.35391164  19.19732806 0.04207515 
  32.65080   21.8736      22.08283598  19.19032174 0.04571721 
  32.70790   20.6697      21.0125612   19.18318166 0.04838   
  32.76490   20.3776      20.24891651  19.17593556 0.04907349 
  32.82190   19.9487      19.7717129   19.16857377 0.05012858 
  32.87900   19.0926      19.5021462   19.16108581 0.05237631 
  32.93600   19.1331      19.35777535  19.15350068 0.05226545 
  32.99310   19.1228      19.27794836  19.14579452 0.0522936 
  33.05010   18.7464      19.22935736  19.13799711 0.05334358 
  33.10710   19.4057      19.1963109   19.13009782 0.05153125 
  33.16420   19.2373      19.17219792  19.12208531 0.05198235 
  33.22120   19.2235      19.1539162   19.11399046 0.05201966 
  33.27820   19.4751      19.1394005   19.10580211 0.05134762 
  33.33530   19.4651      19.1272642   19.09750846 0.051374  
  33.39230   19.6081      19.11682087  19.08914137 0.05099933 
  33.44940   19.1963      19.10796067  19.08067429 0.05209337 
  33.50640   19.087       19.10122303  19.07213971 0.05239168 
  33.56340   18.41        19.09755469  19.06352569 0.05431831 
  33.62050   19.0928      19.09803442  19.05481971 0.05237576 
  33.67750   18.5748      19.10329283  19.04605509 0.05383638 
  33.73450   18.9433      19.11281964  19.03721946 0.05278911 
  33.79160   18.924       19.12443228  19.02829994 0.05284295 
  33.84860   19.0476      19.13422902  19.01933059 0.05250005 
  33.90570   18.8555      19.13770254  19.01028275 0.05303492 
  33.96270   18.9058      19.13121085  19.0011909  0.05289382 
  34.01970   19.6596      19.11355402  18.99204204 0.05086573 
  34.07680   19.5784      19.08678495  18.98282276 0.0510767 
  34.13380   18.9993      19.0556003   18.97356814 0.05263352 
  34.19080   19.5061      19.02487771  18.96426482 0.05126601 
  34.24790   19.7484      18.99803813  18.95489913 0.05063701 
  34.30490   20.0723      18.9765178   18.94550663 0.0498199 
  34.36200   19.2906      18.95982769  18.93605709 0.05183872 
  34.41900   19.3921      18.94674328  18.92658633 0.05156739 
  34.47600   19.2414      18.93588714  18.91708056 0.05197127 
  34.53310   18.6764      18.92625707  18.9075257  0.05354351 
  34.59010   18.8337      18.91732516  18.89795789 0.05309631 
  34.64710   19.0335      18.90885246  18.88836311 0.05253894 
  34.70420   19.4554      18.90071508  18.87872708 0.05139961 
  34.76120   18.905       18.89298533  18.8690862  0.05289606 
  34.81830   19.1717      18.88570673  18.85940926 0.05216022 
  34.87530   19.0558      18.87907806  18.84973274 0.05247746 
  34.93230   18.7392      18.87362339  18.84004228 0.05336407 
  34.98940   18.9722      18.87101058  18.8303234  0.0527087 
  35.04640   18.7836      18.87596349  18.82061268 0.05323793 
  35.10340   19.0503      18.90014788  18.8108956  0.05249261 
  35.16050   18.959       18.96870068  18.80115759 0.0527454 
  35.21750   19.1         19.12648453  18.79143522 0.05235602 
  35.27460   19.0442      19.44015868  18.78169682 0.05250943 
  35.33160   19.6163      19.97995303  18.77197891 0.05097801 
  35.38860   20.5076      20.78483218  18.76226682 0.04876241 
  35.44570   22.1983      21.81192255  18.75254589 0.04504849 
  35.50270   23.1428      22.89566977  18.74285249 0.04320998 
  35.55970   23.1739      23.77833658  18.7331719  0.04315199 
  35.61680   23.4287      24.18867439  18.72348944 0.04268269 
  35.67380   23.5092      23.97713807  18.71384128 0.04253654 
  35.73080   22.7294      23.21791881  18.70421265 0.04399588 
  35.78790   21.9735      22.15259052  18.69458891 0.04550936 
  35.84490   20.5611      21.06234198  18.68500592 0.04863553 
  35.90200   19.6255      20.1468475   18.67543218 0.05095412 
  35.95900   18.7963      19.49519072  18.66590332 0.05320196 
  36.01600   18.3255      19.09237589  18.65640461 0.05456877 
  36.07310   18.7804      18.87508646  18.64692148 0.053247  
  36.13010   18.5798      18.77558394  18.63748916 0.05382189 
  36.18710   19.4127      18.74217479  18.62809295 0.05151267 
  36.24420   19.6364      18.74316974  18.61871841 0.05092583 
  36.30120   19.6421      18.75920147  18.60940024 0.05091105 
  36.35830   19.4515      18.77628073  18.60010763 0.05140992 
  36.41530   19.0326      18.78293637  18.59087492 0.05254143 
  36.47230   19.04        18.77185549  18.58168761 0.05252101 
  36.52940   18.6249      18.74245822  18.57253143 0.05369156 
  36.58640   18.7236      18.70093287  18.56344018 0.05340853 
  36.64340   18.5246      18.65606665  18.55439944 0.05398227 
  36.70050   18.0304      18.61529035  18.54539512 0.05546189 
  36.75750   18.8474      18.58270356  18.53646037 0.05305772 
  36.81460   17.8698      18.5585617   18.5275654  0.05596034 
  36.87160   18.7044      18.54116473  18.5187429  0.05346336 
  36.92860   18.3223      18.5281391   18.50997871 0.0545783 
  36.98570   18.4543      18.51762522  18.50125907 0.05418791 
  37.04270   18.0522      18.50866808  18.49261593 0.05539491 
  37.09970   18.4819      18.50120298  18.48403534 0.05410699 
  37.15680   17.9021      18.49635607  18.47550374 0.05585937 
  37.21380   18.2068      18.49700118  18.4670523  0.05492453 
  37.27090   18.4262      18.50834193  18.45865263 0.05427055 
  37.32790   18.2693      18.53769443  18.45033537 0.05473663 
  37.38490   18.3775      18.59248632  18.44208692 0.05441437 
  37.44200   17.9349      18.67585709  18.43389413 0.05575721 
  37.49900   17.8505      18.78063418  18.4257868  0.05602084 
  37.55600   17.8845      18.88783304  18.41775158 0.05591434 
  37.61310   18.0277      18.9707344   18.40977557 0.05547019 
  37.67010   18.8599      19.00684665  18.40188769 0.05302255 
  37.72720   18.6158      18.99531622  18.39406122 0.05371781 
  37.78420   18.449       18.96512652  18.38632447 0.05420348 
  37.84120   18.4427      18.96568385  18.37866452 0.054222  
  37.89830   18.5079      19.04559031  18.37106897 0.05403098 
  37.95530   18.7762      19.22822456  18.3635652  0.05325891 
  38.01230   18.7491      19.49484244  18.35614059 0.05333589 
  38.06940   20.2548      19.78259173  18.34878304 0.04937101 
  38.12640   20.1303      20.0006031   18.34151898 0.04967636 
  38.18350   21.5905      20.06934091  18.33432355 0.04631667 
  38.24050   20.2762      19.95754689  18.32722256 0.04931891 
  38.29750   20.4293      19.69730658  18.32020388 0.0489493 
  38.35460   20.18        19.36190139  18.31325595 0.04955401 
  38.41160   19.4376      19.03285016  18.30640356 0.05144668 
  38.46860   20.155       18.76721757  18.29963493 0.04961548 
  38.52570   19.2417      18.59002271  18.2929388  0.05197046 
  38.58270   18.7179      18.50077262  18.286339   0.0534248 
  38.63970   18.9192      18.48284214  18.27982407 0.05285636 
  38.69680   18.7064      18.51332394  18.27338308 0.05345764 
  38.75380   18.9529      18.56595248  18.26703887 0.05276237 
  38.81090   18.8378      18.61386873  18.2607694  0.05308476 
  38.86790   18.3796      18.63363273  18.25459681 0.05440815 
  38.92490   18.2642      18.61309638  18.24851021 0.05475192 
  38.98200   18.1434      18.55596934  18.24249926 0.05511646 
  39.03900   17.8811      18.47852479  18.23658512 0.05592497 
  39.09600   18.0236      18.39954154  18.23075722 0.05548281 
  39.15310   17.6989      18.33294656  18.22500559 0.05650069 
  39.21010   17.3308      18.28519847  18.21935036 0.05770074 
  39.26720   18.0199      18.25606348  18.21377164 0.0554942 
  39.32420   18.6257      18.24310775  18.2082889  0.05368926 
  39.38120   19.0753      18.24465735  18.20289217 0.05242382 
  39.43830   19.1059      18.26130264  18.19757209 0.05233985 
  39.49530   18.4983      18.29440244  18.1923471  0.05405902 
  39.55230   18.6214      18.34324706  18.18720762 0.05370166 
  39.60940   18.6168      18.40202649  18.18214463 0.05371492 
  39.66640   18.5279      18.45847029  18.17717558 0.05397266 
  39.72350   19.2149      18.49721445  18.17228277 0.05204295 
  39.78050   19.032       18.50530061  18.167483   0.05254309 
  39.83750   18.3003      18.47943127  18.1627673  0.05464391 
  39.89460   19.1246      18.42685699  18.15812722 0.05228868 
  39.95160   18.8619      18.36140957  18.15357864 0.05301693 
  40.00860   18.2267      18.2970338   18.14911291 0.05486457 
  40.06570   18.2959      18.24342634  18.14472198 0.05465705 
  40.12270   18.5381      18.20487209  18.14042074 0.05394296 
  40.17980   18.7773      18.18127133  18.1361936  0.05325579 
  40.23680   18.8704      18.17185222  18.13205484 0.05299305 
  40.29380   18.2039      18.17808157  18.12799643 0.05493328 
  40.35090   18.7977      18.20617379  18.1240109  0.053198  
  40.40790   18.5137      18.26678323  18.12011161 0.05401405 
  40.46490   19.6867      18.37144095  18.11629089 0.05079571 
  40.52200   18.6334      18.52471672  18.11254161 0.05366707 
  40.57900   18.8498      18.71367534  18.10887624 0.05305096 
  40.63610   18.3949      18.90548845  18.10528125 0.05436289 
  40.69310   18.8652      19.05203542  18.10176852 0.05300765 
  40.75010   18.2732      19.11209984  18.09833098 0.05472495 
  40.80720   18.5904      19.07680947  18.09496205 0.0537912 
  40.86420   19.0125      18.98566187  18.09167279 0.05259698 
  40.92120   18.9608      18.91461578  18.08845646 0.05274039 
  40.97830   18.2642      18.95085665  18.08530683 0.05475192 
  41.03530   18.9424      19.1657523   18.08223412 0.05279162 
  41.09240   19.039       19.59111689  18.07922673 0.05252377 
  41.14940   19.477       20.19516531  18.07629437 0.05134261 
  41.20640   20.1622      20.87766497  18.07343086 0.04959776 
  41.26350   20.5351      21.48244144  18.0706305  0.04869711 
  41.32050   21.6853      21.83766419  18.06790223 0.04611419 
  41.37750   20.8369      21.82482367  18.0652402  0.04799178 
  41.43460   21.5838      21.43457401  18.06263902 0.04633104 
  41.49160   20.3986      20.78266828  18.06010689 0.04902297 
  41.54860   20.4468      20.04126975  18.05763828 0.04890741 
  41.60570   19.8212      19.36200017  18.05522811 0.05045103 
  41.66270   19.2986      18.83630039  18.05288388 0.05181723 
  41.71980   19.9472      18.48199792  18.05059641 0.05013235 
  41.77680   19.0908      18.27236125  18.04837278 0.05238125 
  41.83380   18.9239      18.16114468  18.04620796 0.05284323 
  41.89090   19.341       18.106968    18.04409734 0.05170363 
  41.94790   19.1859      18.08167206  18.04204735 0.05212161 
  42.00490   18.7063      18.06924388  18.04005326 0.05345793 
  42.06200   18.4594      18.06210603  18.03811074 0.05417294 
  42.11900   18.5793      18.05714031  18.03622561 0.05382334 
  42.17610   18.6642      18.05315257  18.03439026 0.05357851 
  42.23310   19.1285      18.04973842  18.03261012 0.05227801 
  42.29010   19.0854      18.04673364  18.03088095 0.05239607 
  42.34720   19.2255      18.04406034  18.02919885 0.05201425 
  42.40420   18.6947      18.04169879  18.0275687  0.0534911 
  42.46120   18.8928      18.03965747  18.02598654 0.05293022 
  42.51830   18.1966      18.03805036  18.02444869 0.05495532 
  42.57530   18.0244      18.03727897  18.02295956 0.05548035 
  42.63240   18.1713      18.0384299   18.02151292 0.05503184 
  42.68940   18.5843      18.04404033  18.02011284 0.05380886 
  42.74640   18.2395      18.05913981  18.01875575 0.05482606 
  42.80350   17.8625      18.09201957  18.01743841 0.05598321 
  42.86050   18.0741      18.15302768  18.01616442 0.05532779 
  42.91750   18.0834      18.25085207  18.01493048 0.05529934 
  42.97460   17.9461      18.3856916   18.01373353 0.05572241 
  43.03160   17.9138      18.54152928  18.0125768  0.05582289 
  43.08870   17.8702      18.68670009  18.01145525 0.05595908 
  43.14570   18.1116      18.78034546  18.01037186 0.05521323 
  43.20270   18.4665      18.79146978  18.00932366 0.05415211 
  43.25980   18.4913      18.71615135  18.00830797 0.05407949 
  43.31680   18.4072      18.58107151  18.0073274  0.05432657 
  43.37380   18.1402      18.42613196  18.0063792  0.05512618 
  43.43090   18.2311      18.28579995  18.00546086 0.05485133 
  43.48790   18.3687      18.17953903  18.0045747  0.05444043 
  43.54500   17.8971      18.10965367  18.00371669 0.05587497 
  43.60200   18.0229      18.06918563  18.00288892 0.05548497 
  43.65900   17.7571      18.04852613  18.002089   0.0563155 
  43.71610   18.1261      18.04031308  18.00131471 0.05516907 
  43.77310   17.8681      18.04004612  18.00056789 0.05596566 
  43.83010   17.7759      18.04479977  17.99984632 0.05625594 
  43.88720   18.229       18.052031    17.99914794 0.05485764 
  43.94420   18.1347      18.05923521  17.99847437 0.0551429 
  44.00130   18.1069      18.06491806  17.99782243 0.05522757 
  44.05830   18.1005      18.06999386  17.99719359 0.05524709 
  44.11530   18.2962      18.07844347  17.9965859  0.05465616 
  44.17240   18.4114      18.09561091  17.99599758 0.05431417 
  44.22940   18.3564      18.12485753  17.99542991 0.05447691 
  44.28640   18.3894      18.16465376  17.99488111 0.05437915 
  44.34350   18.3188      18.20720571  17.99434951 0.05458873 
  44.40050   17.9661      18.23986386  17.99383627 0.05566038 
  44.45750   17.7094      18.25043793  17.99333973 0.05646719 
  44.51460   17.7052      18.23354804  17.99285837 0.05648058 
  44.57160   17.8437      18.1942632   17.99239322 0.05604219 
  44.62870   18.008       18.14418354  17.99194197 0.05553088 
  44.68570   17.4545      18.09542958  17.99150558 0.05729182 
  44.74270   17.8515      18.0558852   17.9910826  0.0560177 
  44.79980   17.7804      18.02828529  17.99067174 0.0562417 
  44.85680   17.4645      18.01146568  17.99027384 0.05725901 
  44.91380   17.538       18.00230528  17.98988761 0.05701904 
  44.97090   18.0368      17.99776363  17.98951183 0.05544221 
  45.02790   18.0911      17.99571609  17.9891473  0.0552758 
  45.08500   17.5294      17.9949803   17.98879222 0.05704702 
  45.14200   17.8371      17.99504903  17.98844733 0.05606293 
  45.19900   17.9214      17.99573376  17.98811153 0.05579921 
  45.25610   17.7211      17.99690111  17.98778379 0.05642991 
  45.31310   17.3941      17.99833944  17.98746481 0.05749076 
  45.37010   17.9533      17.99981811  17.9871536  0.05570007 
  45.42720   17.6303      18.0013078   17.98684923 0.05672053 
  45.48420   17.4281      18.00327618  17.98655238 0.0573786 
  45.54130   17.785       18.00692391  17.98626164 0.05622716 
  45.59830   17.7356      18.01383336  17.9859777  0.05638377 
  45.65530   17.6066      18.02518574  17.98569971 0.05679688 
  45.71240   17.7795      18.04073988  17.98542691 0.05624455 
  45.76940   17.7437      18.05802149  17.98515995 0.05635803 
  45.82640   17.3614      18.07274915  17.98489811 0.05759904 
  45.88350   18.2771      18.08017243  17.98464068 0.05471328 
  45.94050   17.2657      18.07740262  17.98438836 0.0579183 
  45.99760   17.9688      18.065312    17.98414005 0.05565202 
  46.05460   18.0154      18.04798138  17.98389644 0.05550807 
  46.11160   18.2003      18.03030959  17.98365694 0.05494415 
  46.16870   18.0243      18.01611826  17.98342099 0.05548066 
  46.22570   17.9287      18.00730518  17.9831893  0.05577649 
  46.28270   18.5286      18.00382837  17.98296136 0.05397062 
  46.33980   17.955       18.00458236  17.9827367  0.05569479 
  46.39680   18.0155      18.00821558  17.98251604 0.05550776 
  46.45390   17.8729      18.01365853  17.98229859 0.05595063 
  46.51090   18.1848      18.02028351  17.98208507 0.05499098 
  46.56790   17.8316      18.02766826  17.98187511 0.05608022 
  46.62500   18.0117      18.03501261  17.98166838 0.05551947 
  46.68200   18.132       18.04069447  17.98146565 0.05515111 
  46.73900   17.8066      18.04268839  17.9812666  0.05615895 
  46.79610   17.9943      18.03959449  17.981071   0.05557315 
  46.85310   18.1196      18.03181796  17.98087962 0.05518886 
  46.91020   18.2926      18.02146607  17.98069193 0.05466691 
  46.96720   18.2873      18.01140614  17.98050871 0.05468276 
  47.02420   17.8527      18.00424768  17.98032981 0.05601394 
  47.08130   17.9092      18.00203945  17.98015511 0.05583722 
  47.13830   18.6598      18.00628317  17.97998541 0.05359114 
  47.19530   18.6155      18.01785196  17.97982063 0.05371868 
  47.25240   17.8874      18.03654675  17.97966074 0.05590527 
  47.30940   17.5155      18.06011388  17.97950655 0.05709229 
  47.36640   18.0218      18.08407404  17.97935807 0.05548835 
  47.42350   17.5253      18.10246982  17.97921533 0.05706036 
  47.48050   17.4559      18.11010302  17.97907916 0.05728722 
  47.53760   17.0986      18.10574636  17.97894941 0.05848432 
  47.59460   18.2253      18.09327592  17.97882689 0.05486878 
  47.65160   18.3556      18.0794462   17.97871173 0.05447929 
  47.70870   17.7813      18.07055586  17.97860414 0.05623886 
  47.76570   18.2196      18.07045558  17.9785049  0.05488595 
  47.82270   17.8249      18.0804948   17.97841423 0.0561013 
  47.87980   18.3359      18.10130434  17.97833244 0.05453782 
  47.93680   17.4213      18.13440772  17.97826026 0.057401  
  47.99390   18.2079      18.18238671  17.97819791 0.05492122 
  48.05090   17.7755      18.24518438  17.9781461  0.05625721 
  48.10790   18.0981      18.31671323  17.97810522 0.05525442 
  48.16500   17.6122      18.38379734  17.97807572 0.05677882 
  48.22200   18.4305      18.42951553  17.97805826 0.05425789 
  48.27900   17.6346      18.44140024  17.97805332 0.0567067 
  48.33610   17.9484      18.41828349  17.97806148 0.05571527 
  48.39310   18.5479      18.37073288  17.97808329 0.05391446 
  48.45020   18.8195      18.31490836  17.97811941 0.05313637 
  48.50720   17.9738      18.26918693  17.97817034 0.05563654 
  48.56420   18.1806      18.25249109  17.97823672 0.05500369 
  48.62130   17.3542      18.28276545  17.97831935 0.05762294 
  48.67830   18.2658      18.37183157  17.97841857 0.05474712 
  48.73530   18.7079      18.51905009  17.97853519 0.05345335 
  48.79240   19.1127      18.70588968  17.9786701  0.05232123 
  48.84940   19.0749      18.89399059  17.97882352 0.05242491 
  48.90650   18.6551      19.03559595  17.97899667 0.05360464 
  48.96350   19.2002      19.08954558  17.97918966 0.05208279 
  49.02050   18.0899      19.04309231  17.97940346 0.05527947 
  49.07760   17.8855      18.91226262  17.97963924 0.05591121 
  49.13460   18.4825      18.73053175  17.97989689 0.05410523 
  49.19160   17.8189      18.53568831  17.98017755 0.05612019 
  49.24870   18.5446      18.3593319   17.98048251 0.05392405 
  49.30570   18.008       18.22042339  17.98081148 0.05553088 
  49.36280   17.761       18.12282866  17.98116636 0.05630314 
  49.41980   18.5917      18.0616203   17.98154669 0.05378744 
  49.47680   18.4708      18.02699977  17.98195384 0.05413951 
  49.53390   18.5953      18.00932816  17.98238938 0.05377703 
  49.59090   17.9545      18.0012998   17.98285258 0.05569634 
  49.64790   18.4082      17.99830051  17.98334498 0.05432362 
  49.70500   18.5398      17.99806352  17.98386833 0.05393801 
  49.76200   18.9458      17.99987742  17.98442159 0.05278215 
  49.81900   19.2799      18.00397697  17.98500647 0.05186749 
  49.87610   18.8945      18.01112892  17.98562491 0.05292545 
  49.93310   19.3543      18.02215961  17.98627555 0.0516681 
  49.99020   19.1568      18.03749196  17.98696151 0.05220079 
  50.04720   18.7503      18.05631804  17.98768122 0.05333248 
  50.10420   18.134       18.07627596  17.98843667 0.05514503 
  50.16130   18.6388      18.09353077  17.98923012 0.05365152 
  50.21830   18.6575      18.10362467  17.99005963 0.05359775 
  50.27530   18.1555      18.10355521  17.99092739 0.05507973 
  50.33240   18.7986      18.09340265  17.99183587 0.05319545 
  50.38940   18.5624      18.07655196  17.99278272 0.05387234 
  50.44650   18.4225      18.05776338  17.9937721  0.05428145 
  50.50350   19.103       18.04129347  17.99480139 0.0523478 
  50.56050   18.9245      18.02955486  17.99587313 0.05284155 
  50.61760   19.2418      18.02331415  17.99699013 0.05197019 
  50.67460   18.7858      18.02273664  17.99814933 0.0532317 
  50.73160   18.6267      18.02890638  17.99935348 0.05368637 
  50.78870   18.5683      18.0456972   18.00060563 0.05385523 
  50.84570   18.6232      18.08108815  18.00190224 0.05369646 
  50.90280   18.7277      18.14761229  18.00324867 0.05339684 
  50.95980   18.4659      18.25899534  18.00464104 0.05415387 
  51.01680   18.7105      18.42430427  18.00608246 0.05344593 
  51.07390   18.8835      18.63924771  18.00757643 0.05295628 
  51.13090   19.3667      18.87842283  18.00911851 0.05163502 
  51.18790   19.7368      19.09909485  18.01071207 0.05066677 
  51.24500   19.7329      19.25198731  18.01236084 0.05067679 
  51.30200   20.0969      19.30368536  18.01405985 0.04975892 
  51.35910   19.8052      19.25719943  18.01581583 0.05049179 
  51.41610   19.2463      19.14410377  18.01762341 0.05195804 
  51.47310   18.8117      19.00310572  18.01948639 0.05315841 
  51.53020   18.2858      18.86575409  18.02140894 0.05468724 
  51.58720   19.0911      18.74866659  18.02338509 0.05238043 
  51.64420   18.534       18.65049433  18.02541889 0.05395489 
  51.70130   19.0259      18.56150016  18.02751481 0.05255993 
  51.75830   18.7263      18.47695743  18.02966622 0.05340083 
  51.81540   18.4899      18.40179254  18.0318814  0.05408358 
  51.87240   18.916       18.34664114  18.03415329 0.0528653 
  51.92940   18.9661      18.31878038  18.03648641 0.05272565 
  51.98650   19.064       18.31707789  18.03888571 0.05245489 
  52.04350   18.8509      18.33105118  18.04134345 0.05304787 
  52.10050   18.175       18.34520962  18.04386444 0.05502063 
  52.15760   19.1989      18.34596383  18.04645393 0.05208632 
  52.21460   18.6739      18.32828137  18.04910348 0.05355068 
  52.27170   19.1537      18.29789311  18.05182302 0.05220923 
  52.32870   18.9098      18.26626154  18.05460363 0.05288263 
  52.38570   19.0157      18.24276361  18.05745062 0.05258812 
  52.44280   19.2313      18.23027249  18.06036975 0.05199856 
  52.49980   18.6695      18.22487636  18.06335135 0.0535633 
  52.55680   18.5323      18.21919406  18.06640104 0.05395984 
  52.61390   18.4358      18.20768987  18.0695249  0.05424229 
  52.67090   18.8972      18.1900965   18.07271251 0.05291789 
  52.72790   18.3431      18.17041381  18.0759698  0.05451641 
  52.78500   18.0697      18.15417135  18.07930315 0.05534126 
  52.84200   18.4034      18.14658672  18.08270139 0.05433779 
  52.89910   17.8789      18.15208596  18.08617689 0.05593185 
  52.95610   18.477       18.17553164  18.08971793 0.05412134 
  53.01310   17.7865      18.2241472   18.09333098 0.05622242 
  53.07020   17.9026      18.30932402  18.09702297 0.05585781 
  53.12720   17.8407      18.44616621  18.10078137 0.05605161 
  53.18420   18.2223      18.65137151  18.10461297 0.05487781 
  53.24130   18.3757      18.93543166  18.10852506 0.0544197 
  53.29830   18.4843      19.28815943  18.11250426 0.05409997 
  53.35540   18.9006      19.671419    18.11656488 0.05290837 
  53.41240   19.1199      20.01329054  18.120693   0.05230153 
  53.46940   19.3138      20.22608092  18.12489596 0.05177645 
  53.52650   19.8185      20.23803053  18.1291816  0.05045791 
  53.58350   19.7174      20.04142861  18.13353518 0.05071663 
  53.64050   18.9937      19.70547518  18.13796436 0.05264904 
  53.69760   18.7066      19.33498338  18.14247734 0.05345707 
  53.75460   18.4948      19.02671958  18.1470585  0.05406925 
  53.81170   18.2414      18.83661421  18.1517241  0.05482035 
  53.86870   18.0382      18.77414377  18.15645795 0.0554379 
  53.92570   18.4719      18.80680985  18.1612683  0.05413628 
  53.98280   18.2546      18.87917839  18.16616391 0.05478071 
  54.03980   18.0887      18.93277028  18.17112773 0.05528313 
  54.09680   18.2883      18.92797778  18.17616835 0.05467977 
  54.15390   17.9869      18.85822063  18.18129488 0.05559602 
  54.21090   18.0738      18.74617975  18.18648939 0.05532871 
  54.26800   18.2559      18.62338718  18.19177013 0.05477681 
  54.32500   18.3662      18.51497239  18.19711861 0.05444784 
  54.38200   17.9449      18.43149579  18.20254398 0.05572614 
  54.43910   18.3983      18.37208093  18.20805593 0.05435285 
  54.49610   17.6312      18.33133191  18.21363508 0.05671764 
  54.55310   17.8499      18.30372198  18.21929094 0.05602272 
  54.61020   17.8949      18.28570543  18.22503352 0.05588184 
  54.66720   18.0848      18.27533255  18.2308426  0.05529505 
  54.72430   18.2606      18.27109775  18.23673841 0.05476271 
  54.78130   18.4811      18.27156436  18.24270013 0.05410933 
  54.83830   17.923       18.27532311  18.24873784 0.05579423 
  54.89540   18.4073      18.28130007  18.25486211 0.05432627 
  54.95240   18.0347      18.28890344  18.26105128 0.05544866 
  55.00940   18.435       18.29826908  18.26731576 0.05424464 
  55.06650   18.1715      18.31066056  18.27366646 0.05503123 
  55.12350   17.9506      18.32941319  18.28008085 0.05570844 
  55.18060   18.4983      18.36211285  18.28658114 0.05405902 
  55.23760   18.289       18.42312423  18.29314422 0.05467768 
  55.29460   18.6473      18.53634159  18.29978106 0.05362707 
  55.35170   18.3898      18.7342995   18.30650314 0.05437797 
  55.40870   18.5053      19.04782279  18.31328651 0.05403857 
  55.46570   18.379       19.48988574  18.32014249 0.05440992 
  55.52280   19.7763      20.03357587  18.32708285 0.05056558 
  55.57980   20.2412      20.59651321  18.33408284 0.04940419 
  55.63680   21.1703      21.05671838  18.34115408 0.04723599 
  55.69390   21.1308      21.28741286  18.34830869 0.04732428 
  55.75090   20.3627      21.22083814  18.35552109 0.0491094 
  55.80800   20.6827      20.89498584  18.36281607 0.04834959 
  55.86500   20.2042      20.42185346  18.37016752 0.04949466 
  55.92200   18.9272      19.91906647  18.37758761 0.05283402 
  55.97910   19.2372      19.47156101  18.38508895 0.05198262 
  56.03610   19.19        19.12309174  18.39264466 0.05211047 
  56.09310   18.0183      18.87801623  18.40026721 0.05549913 
  56.15020   18.7396      18.71948116  18.4079695  0.05336293 
  56.20720   19.2201      18.62498001  18.41572392 0.05202887 
  56.26430   18.6963      18.57356127  18.42355699 0.05348652 
  56.32130   18.4171      18.55032789  18.43144059 0.05429736 
  56.37830   19.0365      18.54616997  18.43938768 0.05253066 
  56.43540   18.2544      18.55810927  18.44741165 0.05478131 
  56.49240   18.9367      18.5875704   18.45548365 0.05280751 
  56.54940   18.8685      18.63679368  18.46361694 0.05299838 
  56.60650   19.0356      18.70410492  18.47182517 0.05253315 
  56.66350   17.9806      18.77992978  18.48007881 0.0556155 
  56.72060   18.8026      18.84773566  18.48840602 0.05318413 
  56.77760   19.0409      18.88801625  18.49677681 0.05251853 
  56.83460   18.5537      18.88820985  18.5052049  0.05389761 
  56.89170   18.1596      18.85028091  18.51370437 0.05506729 
  56.94870   17.8578      18.78974802  18.5222446  0.05599794 
  57.00570   18.5851      18.7263782   18.53083955 0.05380654 
  57.06280   18.493       18.67702764  18.53950357 0.05407451 
  57.11980   18.751       18.65275048  18.54820541 0.05333049 
  57.17690   18.6761      18.65868316  18.55697469 0.05354437 
  57.23390   18.5951      18.6958067   18.56577978 0.05377761 
  57.29090   19.0362      18.76096573  18.57463506 0.05253149 
  57.34800   18.6778      18.84532659  18.58355525 0.0535395 
  57.40500   18.7658      18.93246516  18.59250816 0.05328843 
  57.46200   18.3194      19.00132539  18.60150839 0.05458694 
  57.51910   18.4968      19.03223939  18.61057089 0.05406341 
  57.57610   18.8277      19.01693341  18.61966293 0.05311323 
  57.63320   18.7018      18.96413957  18.62881541 0.05347079 
  57.69020   18.0382      18.89357843  18.63799528 0.0554379 
  57.74720   19.0502      18.82509973  18.64721751 0.05249289 
  57.80430   18.5554      18.77214937  18.65649737 0.05389267 
  57.86130   19.2817      18.73995265  18.66580134 0.05186265 
  57.91830   18.6875      18.72679991  18.67514459 0.05351171 
  57.97540   18.5452      18.72789306  18.68454258 0.05392231 
  58.03240   18.787       18.73802727  18.69396135 0.0532283 
  58.08950   19.1469      18.75311335  18.70343287 0.05222778 
  58.14650   19.3215      18.77079216  18.71292292 0.05175582 
  58.20350   19.5491      18.7912964   18.722447   0.05115325 
  58.26060   19.3718      18.81806806  18.73202083 0.05162143 
  58.31760   19.6665      18.85695878  18.7416098  0.05084789 
  58.37460   19.6891      18.91350108  18.75122959 0.05078952 
  58.43170   20.0985      18.98849477  18.76089605 0.04975496 
  58.48870   19.994       19.07393635  18.77057426 0.050015  
  58.54570   19.9263      19.15356012  18.78028003 0.05018493 
  58.60280   19.8784      19.20699797  18.79002938 0.05030586 
  58.65980   20.0654      19.2185424   18.79978708 0.04983703 
  58.71690   19.8458      19.18744151  18.80958625 0.0503885 
  58.77390   19.3237      19.12911147  18.81939151 0.05174992 
  58.83090   19.0818      19.06644347  18.82921889 0.05240596 
  58.88800   18.5912      19.02088429  18.83908461 0.05378889 
  58.94500   18.4642      19.00735362  18.84895302 0.05415886 
  59.00200   18.3681      19.03152102  18.8588403  0.05444221 
  59.05910   18.8851      19.08994412  18.86876277 0.0529518 
  59.11610   18.8981      19.17012327  18.87868457 0.05291537 
  59.17320   18.804       19.25327784  18.88863946 0.05318017 
  59.23020   18.9347      19.31798475  18.89859148 0.05281309 
  59.28720   19.8642      19.34885859  18.90855699 0.05034182 
  59.34430   19.5384      19.34399284  18.91855243 0.05118126 
  59.40130   19.1704      19.31552534  18.92854174 0.05216375 
  59.45830   19.089       19.28040314  18.93854136 0.05238619 
  59.51540   19.3401      19.25111262  18.94856779 0.05170604 
  59.57240   18.4103      19.23210328  18.95858489 0.05431742 
  59.62950   19.6155      19.22139587  18.96862675 0.05098009 
  59.68650   19.4795      19.21518665  18.97865718 0.05133602 
  59.74350   20.3536      19.21097194  18.98869273 0.04913136 
  59.80060   19.48        19.20924339  18.99875    0.0513347 
  59.85760   19.5114      19.21288382  19.00879277 0.05125209 
  59.91460   19.822       19.22575616  19.01883765 0.050449  
  59.97170   19.2623      19.25227492  19.02890127 0.05191488 
  60.02870   19.3895      19.29589727  19.03894741 0.05157431 
  60.08580   19.976       19.35573751  19.04901035 0.05006007 
  60.14280   19.4021      19.42256719  19.05905388 0.05154081 
  60.19980   18.9739      19.47997133  19.06909468 0.05270398 
  60.25690   19.4103      19.50954067  19.07914943 0.05151904 
  60.31390   19.3923      19.50031121  19.08918198 0.05156686 
  60.37090   18.9249      19.45550123  19.09920904 0.05284044 
  60.42800   19.0897      19.38926894  19.10924729 0.05238427 
  60.48500   19.5814      19.31966831  19.11926067 0.05106887 
  60.54210   19.5942      19.26065621  19.12928345 0.05103551 
  60.59910   19.2982      19.219472    19.13927967 0.0518183 
  60.65610   19.6692      19.19639034  19.14926604 0.05084091 
  60.71320   19.3277      19.18786614  19.15925923 0.05173921 
  60.77020   19.4338      19.18927359  19.16922342 0.05145674 
  60.82720   19.5258      19.19653513  19.17917532 0.05121429 
  60.88430   18.8009      19.20671116  19.18913157 0.05318894 
  60.94130   19.4063      19.21773757  19.19905654 0.05152966 
  60.99840   18.9878      19.22829626  19.2089843  0.0526654 
  61.05540   19.4434      19.2376142   19.21887933 0.05143133 
  61.11240   19.4666      19.24565933  19.22875832 0.05137004 
  61.16950   18.6189      19.25292311  19.23863785 0.05370887 
  61.22650   18.8641      19.26002969  19.24848264 0.05301075 
  61.28350   19.0752      19.26752039  19.25830933 0.05242409 
  61.34060   19.018       19.27569825  19.26813447 0.05258176 
  61.39760   19.6747      19.28461514  19.27792301 0.0508267 
  61.45460   19.3487      19.29429991  19.28769156 0.05168306 
  61.51170   19.3599      19.30489138  19.29745661 0.05165316 
  61.56870   19.4838      19.31669271  19.30718338 0.05132469 
  61.62580   19.9241      19.33029366  19.31690544 0.05019047 
  61.68280   20.4234      19.34619679  19.3265882  0.04896344 
  61.73980   20.0624      19.36458555  19.33624819 0.04984449 
  61.79690   19.9194      19.38484289  19.34590178 0.05020232 
  61.85390   20.0601      19.40531599  19.35551469 0.0498502 
  61.91090   19.9693      19.42373536  19.36510337 0.05007687 
  61.96800   20.0766      19.43798562  19.37468415 0.04980923 
  62.02500   19.8043      19.44724314  19.38422304 0.05049408 
  62.08210   19.3489      19.4526124   19.39375311 0.05168252 
  62.13910   19.5985      19.45597077  19.40324059 0.05102431 
  62.19610   19.16        19.45885698  19.41270183 0.05219207 
  62.25320   19.8223      19.46203212  19.42215301 0.05044823 
  62.31020   19.2417      19.46580939  19.43156071 0.05197046 
  62.36720   19.604       19.47069439  19.44094119 0.05101   
  62.42430   19.876       19.47761836  19.45031056 0.05031193 
  62.48130   19.5643      19.48762489  19.45963572 0.05111351 
  62.53840   19.5294      19.50149696  19.46894915 0.05120485 
  62.59540   19.506       19.51916318  19.47821801 0.05126628 
  62.65240   19.8061      19.53969494  19.48745841 0.0504895 
  62.70950   20.0773      19.56160851  19.4966863  0.04980749 
  62.76650   20.2065      19.58360666  19.5058692  0.04948903 
  62.82350   20.4086      19.60584361  19.51502313 0.04899895 
  62.88060   20.1264      19.63027885  19.52416395 0.04968598 
  62.93760   19.798       19.65943441  19.53325952 0.05051015 
  62.99470   19.8792      19.69434052  19.54234166 0.05030384 
  63.05170   19.8113      19.73212559  19.55137849 0.05047624 
  63.10870   19.6146      19.76642519  19.56038586 0.05098243 
  63.16580   20.1981      19.78904708  19.56937948 0.04950961 
  63.22280   19.7636      19.79381149  19.5783278  0.05059807 
  63.27980   20.3658      19.78135824  19.58724659 0.04910193 
  63.33690   20.2151      19.7591327   19.59615144 0.04946797 
  63.39390   19.5714      19.73696784  19.60501117 0.05109497 
  63.45100   20.003       19.72216851  19.61385691 0.0499925 
  63.50800   20.0786      19.7174023   19.62265773 0.04980427 
  63.56500   20.1228      19.72065515  19.63142922 0.04969487 
  63.62210   19.6095      19.72753917  19.64018678 0.05099569 
  63.67910   19.8012      19.73413348  19.64889983 0.05050199 
  63.73610   19.8606      19.73912576  19.65758384 0.05035095 
  63.79320   19.1869      19.74367483  19.6662541  0.05211889 
  63.85020   20.0126      19.7497008   19.67488038 0.04996852 
  63.90730   19.6915      19.75831881  19.6834931  0.05078333 
  63.96430   19.5014      19.76904554  19.69206225 0.05127837 
  64.02130   19.4947      19.78033104  19.70060311 0.05129599 
  64.07840   19.4657      19.79049631  19.70913077 0.05137241 
  64.13540   19.4023      19.79840173  19.71761557 0.05154028 
  64.19240   19.8242      19.80433367  19.72607265 0.0504434 
  64.24950   19.3363      19.81063277  19.734517   0.0517162 
  64.30650   19.1309      19.82147625  19.74291925 0.05227146 
  64.36350   19.381       19.84168493  19.75129445 0.05159692 
  64.42060   19.2779      19.87467355  19.75965744 0.05187287 
  64.47760   19.4402      19.92004795  19.76797917 0.0514398 
  64.53470   18.9173      19.97284798  19.77628909 0.05286167 
  64.59170   19.1458      20.02361787  19.78455833 0.05223078 
  64.64870   19.4295      20.06192676  19.79280172 0.05146813 
  64.70580   19.6062      20.08106911  19.8010339  0.05100427 
  64.76280   19.4132      20.08242835  19.8092263  0.05151134 
  64.81980   19.9634      20.07361269  19.81739361 0.05009167 
  64.87690   19.8319      20.06207279  19.82555034 0.05042381 
  64.93390   19.8272      20.05147956  19.83366817 0.05043577 
  64.99100   19.4598      20.04181961  19.84177585 0.05138799 
  65.04800   19.3262      20.03264032  19.84984523 0.05174323 
  65.10500   19.583       20.02527561  19.85789076 0.0510647 
  65.16210   20.1409      20.02218525  19.86592674 0.04965021 
  65.21910   19.8052      20.02504478  19.87392525 0.05049179 
  65.27610   19.6687      20.03357935  19.88190063 0.0508422 
  65.33320   19.6372      20.04640034  19.88986701 0.05092376 
  65.39020   19.7018      20.0641432   19.8977967  0.05075678 
  65.44730   19.6907      20.09456629  19.90571773 0.0507854 
  65.50430   19.7527      20.15657561  19.91360254 0.05062599 
  65.56130   20.2402      20.28090573  19.92146521 0.04940663 
  65.61840   20.6445      20.50407159  19.92931962 0.04843905 
  65.67540   20.8918      20.85192747  19.93713842 0.04786567 
  65.73240   21.5618      21.32106713  19.94493552 0.04637832 
  65.78950   22.6131      21.86073737  19.95272465 0.04422215 
  65.84650   23.0951      22.36721761  19.96047863 0.04329923 
  65.90360   22.2561      22.71274276  19.96822475 0.0449315 
  65.96060   22.5024      22.79218517  19.97593594 0.0444397 
  66.01760   23.1545      22.59325731  19.98362581 0.04318815 
  66.07470   21.4151      22.20099954  19.99130783 0.04669602 
  66.13170   22.124       21.7438457   19.99895506 0.04519978 
  66.18870   22.0062      21.3338189   20.00658095 0.04544174 
  66.24580   21.1376      21.03818424  20.01419877 0.04730906 
  66.30280   20.8091      20.87056439  20.02178173 0.0480559 
  66.35990   20.758       20.79856687  20.02935634 0.0481742 
  66.41690   20.7586      20.76938184  20.0368959  0.04817281 
  66.47390   20.5726      20.73417219  20.04441354 0.04860834 
  66.53100   20.9481      20.66832643  20.05192215 0.04773703 
  66.58800   20.8549      20.57402586  20.05939521 0.04795036 
  66.64500   20.678       20.46702069  20.06684559 0.04836058 
  66.70210   20.5269      20.3649932   20.07428598 0.04871656 
  66.75910   20.5182      20.28132574  20.08168998 0.04873722 
  66.81620   19.9187      20.2210058   20.08908315 0.05020408 
  66.87320   20.0231      20.18296317  20.09643917 0.04994232 
  66.93020   20.4701      20.16249505  20.10377052 0.04885174 
  66.98730   20.0484      20.15448442  20.11108948 0.04987929 
  67.04430   19.9885      20.15475796  20.11836985 0.05002877 
  67.10130   20.9137      20.16036579  20.12562384 0.04781555 
  67.15840   20.1738      20.16943327  20.13286345 0.04956924 
  67.21540   20.8486      20.18073034  20.14006262 0.04796485 
  67.27240   20.2219      20.19373614  20.14723329 0.04945134 
  67.32950   20.6163      20.20912581  20.15438714 0.04850531 
  67.38650   20.5051      20.22977575  20.16149825 0.04876836 
  67.44360   20.5979      20.26234543  20.16859065 0.04854864 
  67.50060   20.227       20.31725589  20.17563853 0.04943887 
  67.55760   20.3877      20.40675754  20.1826533  0.04904918 
  67.61470   21.0258      20.53961585  20.18964609 0.04756062 
  67.67170   21.3477      20.71267987  20.19659126 0.04684345 
  67.72870   20.7317      20.90622835  20.20349988 0.04823531 
  67.78580   21.2875      21.08320968  20.21038269 0.04697592 
  67.84280   21.4038      21.19685891  20.21721425 0.04672068 
  67.89990   20.3839      21.21139603  20.22401714 0.04905833 
  67.95690   21.2641      21.12415059  20.23076605 0.04702762 
  68.01390   20.7092      20.96894089  20.23747142 0.04828772 
  68.07100   20.3448      20.79378599  20.24414329 0.04915261 
  68.12800   20.6534      20.64117821  20.25075662 0.04841818 
  68.18500   20.8376      20.53525383  20.25732141 0.04799017 
  68.24210   20.7509      20.48092756  20.26384723 0.04819068 
  68.29910   20.2348      20.46809889  20.27030935 0.04941981 
  68.35620   20.9835      20.47835152  20.27672849 0.04765649 
  68.41320   21.5902      20.49228588  20.28308013 0.04631731 
  68.47020   20.5825      20.49538961  20.28937347 0.04858496 
  68.52730   20.8674      20.4823629   20.29561721 0.04792164 
  68.58430   21.2807      20.45710749  20.30178724 0.04699094 
  68.64130   20.6738      20.42759421  20.30789222 0.0483704 
  68.69840   21.0919      20.40106954  20.31394027 0.04741157 
  68.75540   20.8425      20.38176146  20.31990773 0.04797889 
  68.81250   20.2905      20.37035345  20.32581296 0.04928415 
  68.86950   20.4867      20.36547278  20.33163262 0.04881216 
  68.92650   19.7628      20.36506088  20.33737441 0.05060012 
  68.98360   19.3134      20.36750338  20.34304539 0.05177752 
  69.04060   20.3334      20.37194988  20.34862279 0.04918017 
  69.09760   20.7863      20.3782919   20.35411365 0.04810861 
  69.15470   20.609       20.38702721  20.35952433 0.04852249 
  69.21170   20.5185      20.39929187  20.36483273 0.04873651 
  69.26880   20.4205      20.41744829  20.37005425 0.0489704 
  69.32580   20.6328      20.44575647  20.3751673  0.04846652 
  69.38280   20.6412      20.49142177  20.38017773 0.0484468 
  69.43990   20.411       20.56445312  20.38509059 0.04899319 
  69.49690   21.0184      20.67455273  20.38988512 0.04757736 
  69.55390   20.7595      20.82611007  20.39456638 0.04817072 
  69.61100   21.1316      21.01060315  20.39913857 0.04732249 
  69.66800   21.6574      21.20029624  20.40358187 0.04617359 
  69.72510   21.7965      21.35302564  20.40790799 0.04587893 
  69.78210   21.2846      21.42293721  20.41209779 0.04698233 
  69.83910   20.4615      21.38610723  20.41615494 0.04887227 
  69.89620   21.1978      21.25690824  20.42008207 0.04717471 
  69.95320   20.7509      21.07838624  20.42386122 0.04819068 
  70.01020   20.6783      20.8960295   20.42749511 0.04835987 
  70.06730   20.8755      20.74211006  20.43098537 0.04790304 
  70.12430   20.5159      20.63124214  20.43431532 0.04874268 
  70.18130   21.443       20.56154033  20.43748671 0.04663527 
  70.23840   20.6569      20.52282896  20.44050009 0.04840997 
  70.29540   20.4999      20.50335264  20.44334025 0.04878073 
  70.35250   20.6541      20.49352149  20.44601239 0.04841654 
  70.40950   20.6649      20.48762304  20.44850236 0.04839123 
  70.46650   19.692       20.48309701  20.45081013 0.05078204 
  70.52360   20.0349      20.4793113   20.45293433 0.0499129 
  70.58060   20.5195      20.47644656  20.4548625  0.04873413 
  70.63760   20.9909      20.47481491  20.45659348 0.04763969 
  70.69470   20.6702      20.47467263  20.45812465 0.04837883 
  70.75170   20.3111      20.47624615  20.45944546 0.04923416 
  70.80880   20.2442      20.47981551  20.46055532 0.04939686 
  70.86580   20.1354      20.48562978  20.46144503 0.04966378 
  70.92280   20.5466      20.49369253  20.4621114  0.04866985 
  70.97990   20.0849      20.50342889  20.46254962 0.04978865 
  71.03690   20.1507      20.51349847  20.46275272 0.04962607 
  71.09390   20.5426      20.52225462  20.46271623 0.04867933 
  71.15100   20.2833      20.52865561  20.46243393 0.04930164 
  71.20800   20.1269      20.53377949  20.46190127 0.04968475 
  71.26510   20.6262      20.54207283  20.46111082 0.04848203 
  71.32210   20.8412      20.56055893  20.46005975 0.04798188 
  71.37910   21.145       20.59654057  20.45874131 0.0472925 
  71.43620   21.1057      20.65428186  20.45714685 0.04738057 
  71.49320   20.8681      20.73095897  20.45527631 0.04792003 
  71.55020   21.381       20.81525193  20.45312152 0.0467705 
  71.60730   20.7578      20.88833654  20.45067231 0.04817466 
  71.66430   21.3525      20.9290887   20.4479316  0.04683292 
  71.72140   21.5964      20.9253652   20.44488415 0.04630401 
  71.77840   20.3763      20.88326946  20.44153502 0.04907662 
  71.83540   21.6217      20.82374335  20.43787356 0.04624983 
  71.89250   20.9564      20.76989433  20.43388695 0.04771812 
  71.94950   20.611       20.73788229  20.42958364 0.04851778 
  72.00650   20.4282      20.73258807  20.42495144 0.04895194 
  72.06360   20.5342      20.74949451  20.41997591 0.04869924 
  72.12060   20.7255      20.77955318  20.4146691  0.04824974 
  72.17770   20.6261      20.81569155  20.40900706 0.04848226 
  72.23470   20.8554      20.85495701  20.40300437 0.04794921 
  72.29170   20.216       20.89421412  20.39664626 0.04946577 
  72.34880   21.2913      20.92451416  20.38991553 0.04696754 
  72.40580   20.8286      20.93187477  20.38283079 0.04801091 
  72.46280   20.3258      20.90642146  20.37537568 0.04919856 
  72.51990   20.5323      20.85308427  20.36753136 0.04870375 
  72.57690   20.2442      20.79205178  20.35932067 0.04939686 
  72.63400   21.1213      20.74676683  20.35071027 0.04734557 
  72.69100   21.4321      20.73317989  20.34172593 0.04665898 
  72.74800   21.148       20.75222314  20.33234871 0.0472858 
  72.80510   20.524       20.78934111  20.32255705 0.04872345 
  72.86210   21.256       20.81907303  20.31238137 0.04704554 
  72.91910   20.9111      20.81599462  20.30180117 0.04782149 
  72.97620   20.8942      20.76783966  20.29079331 0.04786017 
  73.03320   20.6552      20.68221441  20.27939308 0.04841396 
  73.09020   20.8563      20.57812936  20.26757847 0.04794714 
  73.14730   21.1463      20.47502401  20.25532483 0.0472896 
  73.20430   20.7737      20.38688874  20.2426725  0.04813779 
  73.26140   21.0711      20.31891329  20.22957475 0.04745837 
  73.31840   20.3902      20.2701155   20.21607541 0.04904317 
  73.37540   20.6332      20.23578416  20.20215015 0.04846558 
  73.43250   20.3375      20.21096788  20.18777197 0.04917025 
  73.48950   20.5675      20.19212223  20.17299008 0.0486204 
  73.54650   20.3875      20.17726492  20.15777889 0.04904966 
  73.60360   20.5558      20.16582846  20.14211014 0.04864807 
  73.66060   20.5295      20.15810564  20.12603861 0.04871039 
  73.71770   20.3963      20.15448078  20.10950822 0.0490285 
  73.77470   19.7082      20.15499038  20.09257758 0.0507403 
  73.83170   19.9216      20.15889629  20.07521924 0.05019677 
  73.88880   20.0489      20.16456508  20.05740318 0.04987805 
  73.94580   20.4744      20.16962032  20.03919383 0.04884148 
  74.00280   20.4286      20.17151154  20.02056285 0.04895098 
  74.05990   19.8061      20.1674301   20.00147943 0.0504895 
  74.11690   19.7964      20.15418454  19.98201394 0.05051423 
  74.17400   20.1428      20.12939065  19.96210211 0.04964553 
  74.23100   19.0094      20.09324973  19.94181829 0.05260555 
  74.28800   18.8828      20.04852293  19.92113314 0.05295825 
  74.34510   19.3582      19.99989737  19.90001511 0.0516577 
  74.40210   20.0118      19.95266769  19.87854457 0.04997052 
  74.45910   19.7568      19.91070622  19.85669192 0.05061548 
  74.51620   19.4361      19.87645501  19.83442556 0.05145065 
  74.57320   18.7857      19.85168037  19.8118319  0.05323198 
  74.63030   19.7826      19.83789125  19.78884083 0.05054947 
  74.68730   19.2318      19.83686468  19.76554276 0.05199721 
  74.74430   19.8168      19.84952199  19.74190839 0.05046223 
  74.80140   20.3341      19.87449646  19.71790685 0.04917847 
  74.85840   20.1899      19.90682149  19.6936345  0.04952972 
  74.91540   20.011       19.93912056  19.66906271 0.04997252 
  74.97250   20.4163      19.96503772  19.64416165 0.04898047 
  75.02950   19.4091      19.98487638  19.61903347 0.05152222 
  75.08660   19.4297      20.00978259  19.59360593 0.0514676 
  75.14360   20.9823      20.05600298  19.56798497 0.04765922 
  75.20060   20.4406      20.1327924   19.54214411 0.04892224 
  75.25770   20.6472      20.23214496  19.51605638 0.04843272 
  75.31470   20.4823      20.32545349  19.48983313 0.04882264 
  75.37170   21.7301      20.37205312  19.46344991 0.04601912 
  75.42880   19.8793      20.33706618  19.43688228 0.05030358 
  75.48580   21.0599      20.21541512  19.41024667 0.04748361 
  75.54280   18.9861      20.03470202  19.38352126 0         
#--eof--eof--eof--eof--eof--eof--eof--eof--eof--eof--eof--eof--eof--eof--eof--#
