# Supplementary material
Source: MDPI journal article supplement (https://www.mdpi.com/2304-6740/10/9/132)
Supplement: s1 [file s1 › Data S2. D2CO3_long_wavelength.cif]

data_D2CO3_Complete_W2
_gsas_GSASII_version  5278
_pd_block_id
   2022-05-25T09:50|D2CO3_Complete_W2|SebastianBenz|STRESS-SPEC
_audit_creation_method  "created in GSAS-II"
_audit_creation_date  2022-05-25T09:50
_audit_author_name  "Sebastian Benz"
_audit_update_record
   "2022-05-25T09:50  Initial software-generated CIF"

# Standard version of Publication_Template template follows
#=============================================================================
# this information describes the project, paper etc. for the CIF             #
# Acta Cryst. Section C papers and editorial correspondence is generated     #
# from the information in this section                                       #
#                                                                            #
#   (from)   CIF submission form for Rietveld refinements (Acta Cryst. C)    #
#                                                 Version 14 December 1998   #
#=============================================================================
# 1. SUBMISSION DETAILS

_publ_contact_author_name            ?   # Name of author for correspondence
_publ_contact_author_address             # Address of author for correspondence
; ?
;
_publ_contact_author_email           ?
_publ_contact_author_fax             ?
_publ_contact_author_phone           ?

_publ_contact_letter
; ?
;
   
_publ_requested_journal              ?
_publ_requested_coeditor_name        ?
_publ_requested_category             ?   # Acta C: one of CI/CM/CO/FI/FM/FO

#==============================================================================

# 2. PROCESSING SUMMARY (IUCr Office Use Only)

_journal_data_validation_number      ?

_journal_date_recd_electronic        ?
_journal_date_to_coeditor            ?
_journal_date_from_coeditor          ?
_journal_date_accepted               ?
_journal_date_printers_first         ?
_journal_date_printers_final         ?
_journal_date_proofs_out             ?
_journal_date_proofs_in              ?
_journal_coeditor_name               ?
_journal_coeditor_code               ?
_journal_coeditor_notes
; ?
;
_journal_techeditor_code             ?
_journal_techeditor_notes
; ?
;
_journal_coden_ASTM                  ?
_journal_name_full                   ?
_journal_year                        ?
_journal_volume                      ?
_journal_issue                       ?
_journal_page_first                  ?
_journal_page_last                   ?
_journal_paper_category              ?
_journal_suppl_publ_number           ?
_journal_suppl_publ_pages            ?

#==============================================================================

# 3. TITLE AND AUTHOR LIST

_publ_section_title
; ?
;
_publ_section_title_footnote
; ?
;         
 
# The loop structure below should contain the names and addresses of all 
# authors, in the required order of publication. Repeat as necessary.

loop_
	_publ_author_name
        _publ_author_footnote
	_publ_author_address
 ?                                   #<--'Last name, first name' 
; ?
;
; ?
;

#==============================================================================

# 4. TEXT

_publ_section_synopsis
;  ?
;
_publ_section_abstract                         
; ?
;          
_publ_section_comment                          
; ?
;
_publ_section_exptl_prep      # Details of the preparation of the sample(s)
                              # should be given here. 
; ?
;
_publ_section_exptl_refinement                  
; ?
;
_publ_section_references
; ?
;
_publ_section_figure_captions
; ?
;
_publ_section_acknowledgements
; ?
;

#=============================================================================
# 5. OVERALL REFINEMENT & COMPUTING DETAILS

_refine_special_details
; ?
;
_pd_proc_ls_special_details
; ?
;

# The following items are used to identify the programs used.
_computing_molecular_graphics     ?
_computing_publication_material   ?

_refine_ls_weighting_scheme       ?        
_refine_ls_weighting_details      ?
_refine_ls_hydrogen_treatment     ?        
_refine_ls_extinction_method      ?        
_refine_ls_extinction_coef        ?         
_refine_ls_number_constraints     ?        

_refine_ls_restrained_S_all       ?        
_refine_ls_restrained_S_obs       ?

#==============================================================================
# 6. SAMPLE PREPARATION DATA

# (In the unusual case where multiple samples are used in a single
#  Rietveld study, this information should be moved into the phase
#  blocks)

# The following three fields describe the preparation of the material.
# The cooling rate is in K/min.  The pressure at which the sample was  
# prepared is in kPa.  The temperature of preparation is in K.
               
_pd_prep_cool_rate                ?        
_pd_prep_pressure                 ?        
_pd_prep_temperature              ?        

_pd_char_colour                   ?       # use ICDD colour descriptions

_pd_proc_info_datetime  2022-05-25T09:50
_pd_calc_method  "Rietveld Refinement"
_computing_structure_refinement
   "GSAS-II (Toby & Von Dreele, J. Appl. Cryst. 46, 544-549, 2013)"
_refine_ls_matrix_type  full
_refine_ls_number_parameters  26
_refine_ls_goodness_of_fit_all  0.116
_refine_ls_shift/su_max  0.0327

# OVERALL WEIGHTED R-FACTOR
_refine_ls_wR_factor_obs  0.02662

# Standard version of Phase_Template template follows
#==============================================================================
# 7. CHEMICAL, STRUCTURAL AND CRYSTAL DATA

_pd_char_particle_morphology      ?

_chemical_name_systematic
; ?
;
_chemical_name_common             ?
_chemical_formula_moiety          ?        
_chemical_formula_structural      ?        
_chemical_formula_analytical      ?
_chemical_melting_point           ?
_chemical_compound_source         ?       # for minerals and 
                                          # natural products
_symmetry_space_group_name_Hall   "-P 2ybc"

_exptl_crystal_F_000               ?
_exptl_crystal_density_meas        ?
_exptl_crystal_density_method      ?

_cell_special_details
; ?
;

_geom_special_details             ?

# The following item identifies the program(s) used (if appropriate).
_computing_structure_solution     ?        

#==============================================================================

# 8. Phase information from GSAS-II


# phase info for D$_2$CO$_3$ follows
_pd_phase_name  D$_2$CO$_3$
_cell_length_a  5.3917(22)
_cell_length_b  6.661(4)
_cell_length_c  5.6900(12)
_cell_angle_alpha  90
_cell_angle_beta   92.657(28)
_cell_angle_gamma  90
_cell_volume  204.12(15)
_exptl_crystal_density_diffrn  2.0837
_symmetry_cell_setting  monoclinic
_symmetry_space_group_name_H-M  "P 21/c"
loop_
    _space_group_symop_id
    _space_group_symop_operation_xyz
     1  x,y,z
     2  -x,1/2+y,1/2-z
     3  -x,-y,-z
     4  x,1/2-y,1/2+z

# ATOMIC COORDINATES AND DISPLACEMENT PARAMETERS
loop_ 
   _atom_site_label
   _atom_site_type_symbol
   _atom_site_fract_x
   _atom_site_fract_y
   _atom_site_fract_z
   _atom_site_occupancy
   _atom_site_adp_type
   _atom_site_U_iso_or_equiv
   _atom_site_site_symmetry_multiplicity
C1     C    0.302(6)    0.174(4)    0.591(6)    1.0000     Uiso 0.0400     4   
O1     O    0.204(8)    0.004(6)    0.667(6)    1.0000     Uiso 0.0560     4   
O2     O    0.212(11)   0.350(6)    0.660(9)    1.0000     Uiso 0.0560     4   
O3     O    0.494(6)    0.170(6)    0.452(7)    1.0000     Uiso 0.0560     4   
D1     D    0.284(12)   -0.119(5)   0.608(9)    1.0000     Uiso 0.0820     4   
D2     D    0.295(11)   0.469(5)    0.595(10)   1.0000     Uiso 0.0820     4   

loop_  _atom_type_symbol _atom_type_number_in_cell
        _atom_type_scat_Cromer_Mann_a1 _atom_type_scat_Cromer_Mann_a2 _atom_type_scat_Cromer_Mann_a3
        _atom_type_scat_Cromer_Mann_a4 _atom_type_scat_Cromer_Mann_b1 _atom_type_scat_Cromer_Mann_b2
        _atom_type_scat_Cromer_Mann_b3 _atom_type_scat_Cromer_Mann_b4 _atom_type_scat_Cromer_Mann_c
        _atom_type_scat_length_neutron _atom_type_scat_source
  C       4      2.31       1.02       1.5886     0.865      20.8439    10.2075    0.5687     51.6512    0.2156     0.6648
      https://subversion.xray.aps.anl.gov/pyGSAS/trunk/atmdata.py
  D       8      0.493      0.3229     0.1402     0.0408     10.5109    26.1257    3.1424     57.7997    0.003      0.6674
      https://subversion.xray.aps.anl.gov/pyGSAS/trunk/atmdata.py
  O       12     3.0485     2.2868     1.5463     0.867      13.2771    5.7011     0.3239     32.9089    0.2508     0.5805
      https://subversion.xray.aps.anl.gov/pyGSAS/trunk/atmdata.py

# Note that Z affects _cell_formula_sum and _weight
_cell_formula_units_Z  4
_chemical_formula_sum  "C D2 O3"
_chemical_formula_weight  64.04

# MOLECULAR GEOMETRY
loop_
   _geom_bond_atom_site_label_1
   _geom_bond_atom_site_label_2
   _geom_bond_distance
   _geom_bond_site_symmetry_1
   _geom_bond_site_symmetry_2
   _geom_bond_publ_flag
  C1     O1     1.332(15)    1_555    1_555 yes
  C1     O2     1.335(15)    1_555    1_555 yes
  C1     O3     1.336(16)    1_555    1_555 yes
  O1     C1     1.332(15)    1_555    1_555 yes
  O1     D1     0.991(16)    1_555    1_555 yes
  O2     C1     1.335(15)    1_555    1_555 yes
  O2     D2     0.989(16)    1_555    1_555 yes
  O3     C1     1.336(16)    1_555    1_555 yes
  O3     D1     1.30(6)      1_555    3_656 yes
  D1     O1     0.991(16)    1_555    1_555 yes
  D1     O3     1.30(6)      1_555    3_656 yes
  D2     O2     0.989(16)    1_555    1_555 yes

loop_
   _geom_angle_atom_site_label_1
   _geom_angle_atom_site_label_2
   _geom_angle_atom_site_label_3
   _geom_angle
   _geom_angle_site_symmetry_1
   _geom_angle_site_symmetry_2
   _geom_angle_site_symmetry_3
   _geom_angle_publ_flag
  O1     C1     O2     119.7(10)     1_555  1_555    1_555 yes
  O1     C1     O3     120.4(10)     1_555  1_555    1_555 yes
  O2     C1     O3     119.9(10)     1_555  1_555    1_555 yes
  C1     O1     D1     113.9(12)     1_555  1_555    1_555 yes
  C1     O2     D2     114.3(12)     1_555  1_555    1_555 yes
  C1     O3     D1     155(5)        1_555  1_555    3_656 yes
  O1     D1     O3     136(5)        1_555  1_555    3_656 yes
_pd_proc_ls_pref_orient_corr
   "March-Dollase correction coef. = 1.000 axis = [0, 0, 1]"
_pd_proc_ls_profile_function
;
Finger-Cox-Jephcoat function parameters U, V, W, X, Y, SH/L:
  peak variance(Gauss) = Utan(Th)^2^+Vtan(Th)+W:
  peak HW(Lorentz) = X/cos(Th)+Ytan(Th); SH/L = S/L+H/L
  U, V, W in (centideg)^2^, X & Y in centideg
    0.000, 0.000, 294.823, 0.000, 0.000, 0.001, 

;

# Standard version of Instrument_Template template follows
#==============================================================================
# 9. INSTRUMENT CHARACTERIZATION

_exptl_special_details
; ?
;

# if regions of the data are excluded, the reason(s) are supplied here:
_pd_proc_info_excluded_regions
; ?
;

# The following item is used to identify the equipment used to record 
# the powder pattern when the diffractogram was measured at a laboratory 
# other than the authors' home institution, e.g. when neutron or synchrotron
# radiation is used.

_pd_instr_location
; ?
;
_pd_calibration_special_details           # description of the method used
                                          # to calibrate the instrument
; ?
;

_diffrn_source                    ?       
_diffrn_source_target             ?
_diffrn_source_type               ?
_diffrn_measurement_device_type   "STRESS_SPEC"       
_diffrn_detector                  ?       
_diffrn_detector_type             ?       # make or model of detector

_pd_meas_scan_method              ?       # options are 'step', 'cont',
                                          # 'tof', 'fixed' or
                                          # 'disp' (= dispersive)
_pd_meas_special_details
;  ?
;

# The following two items identify the program(s) used (if appropriate).
_computing_data_collection        ?        
_computing_data_reduction         ?                   

# Describe any processing performed on the data, prior to refinement.
# For example: a manual Lp correction or a precomputed absorption correction
_pd_proc_info_data_reduction      ?

# The following item is used for angular dispersive measurements only.

_diffrn_radiation_monochromator   ?        

# The following items are used to define the size of the instrument.
# Not all distances are appropriate for all instrument types.

_pd_instr_dist_src/mono           ?
_pd_instr_dist_mono/spec          ?
_pd_instr_dist_src/spec           ?
_pd_instr_dist_spec/anal          ?
_pd_instr_dist_anal/detc          ?
_pd_instr_dist_spec/detc          ?

# 10. Specimen size and mounting information

# The next three fields give the specimen dimensions in mm.  The equatorial 
# plane contains the incident and diffracted beam.

_pd_spec_size_axial               ?       # perpendicular to 
                                          # equatorial plane

_pd_spec_size_equat               ?       # parallel to 
                                          # scattering vector 
                                          # in transmission

_pd_spec_size_thick               ?       # parallel to 
                                          # scattering vector 
                                          # in reflection

_pd_spec_mounting                         # This field should be
                                          # used to give details of the 
                                          # container.
; ?
;

_pd_spec_mount_mode               ?       # options are 'reflection' 
                                          # or 'transmission'
    
_pd_spec_shape                    ?       # options are 'cylinder' 
                                          # 'flat_sheet' or 'irregular'


_diffrn_radiation_wavelength  2.11754
_refine_ls_R_F_factor        0.25258
_refine_ls_R_Fsqd_factor     0.23847
_pd_proc_ls_prof_R_factor     0.02051
_pd_proc_ls_prof_wR_factor    0.02696
_gsas_proc_ls_prof_R_B_factor   0.03175
_gsas_proc_ls_prof_wR_B_factor  0.04891
_pd_proc_ls_prof_wR_expected  0.23540
_diffrn_radiation_probe  neutron
_pd_proc_ls_background_function
;
Background function: "lin interpolate" function with 14 terms:
    17.408, 16.829, 16.781, 15.994, 17.661, 16.415, 17.303, 18.654, 
    16.887, 18.633, 18.437, 17.729, 19.688, 18.464, 
;
_diffrn_ambient_temperature  298
_cell_measurement_temperature 298
_diffrn_ambient_pressure  1.85e6

# STRUCTURE FACTOR TABLE
loop_
   _refln_index_h
   _refln_index_k
   _refln_index_l
   _refln_F_squared_meas
   _refln_F_squared_calc
   _refln_phase_calc
   _refln_d_spacing
   _gsas_i100_meas
  0    1    1    4.2851     3.2542     -180.0  4.32361  17.63  
  1    1    0    11.7507    7.9204     180.0   4.18806  45.45  
  1    1    -1   1.1814     0.0556     180.0   3.43121  3.12   
  0    2    0    6.0505     1.4658     -0.0    3.33034  7.55   
  1    1    1    6.7116     4.0769     0.0     3.31506  16.61  
  0    2    1    9.4916     8.0226     -180.0  2.87343  18.00  
  0    0    2    7.8111     4.1723     0.0     2.84193  7.26   
  1    2    0    4.7736     1.8426     -0.0    2.83257  8.82   
  2    0    0    78.7605    50.2662    180.0   2.69298  66.32  
  0    1    2    0.7709     1.9798     180.0   2.61394  1.23   
  1    0    -2   55.3181    41.9350    0.0     2.56300  42.60  
  1    2    -1   4.0695     3.1479     -180.0  2.56024  6.26   
  1    2    1    0.1779     1.7874     -180.0  2.51088  0.26   
  2    1    0    0.0194     0.0756     0.0     2.49664  0.03   
  1    0    2    139.0265   137.6698   180.0   2.46674  100.00 
  1    1    -2   1.8409     0.7095     -0.0    2.39202  2.51   
  2    1    -1   2.3070     0.3384     -180.0  2.32289  2.99   
  1    1    2    2.1611     0.8028     180.0   2.31320  2.78   
  2    1    1    0.1472     0.0108     0.0     2.25051  0.18   
  0    2    2    10.6865    1.7868     180.0   2.16181  12.23  
  2    2    0    10.7669    6.3605     180.0   2.09403  11.69  
  0    3    1    16.2515    15.0968    0.0     2.06805  17.28  
  1    3    0    0.0221     0.0024     -0.0    2.05266  0.02   
  1    2    -2   10.3541    4.3409     -0.0    2.03114  10.69  
  2    0    -2   0.0596     0.0038     0.0     2.00163  0.03   
  2    2    -1   3.4788     3.3742     -180.0  1.98831  3.47   
  1    2    2    1.1912     0.8713     180.0   1.98222  1.18   
  2    2    1    1.3802     0.5700     0.0     1.94234  1.33   
  1    3    -1   28.5324    11.9957    -180.0  1.94161  27.41  
  1    3    1    12.4802    8.3612     -180.0  1.91982  11.78  
  2    1    -2   4.0927     3.2267     180.0   1.91695  3.85   
  2    0    2    6.9731     5.4955     -0.0    1.91103  3.27   
  2    1    2    26.6056    11.2437    -0.0    1.83692  23.47  
  0    1    3    7.2487     0.2914     0.0     1.82233  6.32   
_reflns_number_total  34
_reflns_limit_h_min  0
_reflns_limit_h_max  2
_reflns_limit_k_min  0
_reflns_limit_k_max  3
_reflns_limit_l_min  -2
_reflns_limit_l_max  3
_reflns_d_resolution_low    4.324
_reflns_d_resolution_high   1.822

# POWDER DATA TABLE
_pd_meas_number_of_points  934

loop_
   _pd_meas_2theta_scan
   _pd_meas_intensity_total
   _pd_calc_intensity_total
   _pd_proc_intensity_bkg_calc
   _pd_proc_ls_weight
  22.38650   16.1905      0            0           0         
  22.44360   15.7162      0            0           0         
  22.50060   16.1533      0            0           0         
  22.55760   16.2586      0            0           0         
  22.61470   15.89        0            0           0         
  22.67170   16.1034      0            0           0         
  22.72870   16.2276      0            0           0         
  22.78580   15.5835      0            0           0         
  22.84280   16.0582      0            0           0         
  22.89980   15.2117      0            0           0         
  22.95690   15.8816      0            0           0         
  23.01390   15.7072      0            0           0         
  23.07090   15.3991      0            0           0         
  23.12800   15.7148      0            0           0         
  23.18500   15.9263      0            0           0         
  23.24200   15.1616      0            0           0         
  23.29910   15.8689      0            0           0         
  23.35610   16.225       0            0           0         
  23.41310   16.102       0            0           0         
  23.47020   15.3762      0            0           0         
  23.52720   15.7656      0            0           0         
  23.58420   15.4595      0            0           0         
  23.64130   16.0171      0            0           0         
  23.69830   15.953       0            0           0         
  23.75530   15.7339      0            0           0         
  23.81240   15.3057      0            0           0         
  23.86940   16.386       0            0           0         
  23.92640   16.45        0            0           0         
  23.98350   16.1977      0            0           0         
  24.04050   15.8069      0            0           0         
  24.09750   16.3746      0            0           0         
  24.15460   16.4436      0            0           0         
  24.21160   15.8684      0            0           0         
  24.26860   15.9467      0            0           0         
  24.32570   16.5909      0            0           0         
  24.38270   16.872       0            0           0         
  24.43970   15.972       0            0           0         
  24.49680   16.5968      0            0           0         
  24.55380   16.2332      0            0           0         
  24.61080   16.811       0            0           0         
  24.66790   16.4988      0            0           0         
  24.72490   16.4946      0            0           0         
  24.78190   17.0848      0            0           0         
  24.83900   17.0028      0            0           0         
  24.89600   16.6816      0            0           0         
  24.95300   17.5335      0            0           0         
  25.01010   17.3312      0            0           0         
  25.06710   16.3         0            0           0         
  25.12410   17.7031      0            0           0         
  25.18120   17.3647      0            0           0         
  25.23820   18.375       0            0           0         
  25.29520   17.6688      0            0           0         
  25.35230   17.4631      0            0           0         
  25.40930   17.3606      0            0           0         
  25.46630   17.9209      0            0           0         
  25.52340   17.3488      0            0           0         
  25.58040   17.2634      0            0           0         
  25.63740   17.8045      0            0           0         
  25.69450   17.5872      0            0           0         
  25.75150   17.3963      0            0           0         
  25.80850   17.8503      0            0           0         
  25.86560   17.7791      0            0           0         
  25.92260   17.5646      0            0           0         
  25.97960   17.0351      0            0           0         
  26.03670   17.6782      17.40858682  17.40762707 0.05656685 
  26.09370   17.2172      17.39931177  17.39831604 0.05808145 
  26.15070   17.6108      17.39003905  17.38900501 0.05678334 
  26.20780   17.4566      17.38075263  17.37967765 0.05728492 
  26.26480   17.9651      17.37148527  17.37036662 0.05566348 
  26.32180   17.5784      17.36222098  17.36105559 0.056888  
  26.37890   17.5651      17.35294383  17.35172822 0.05693107 
  26.43590   17.6879      17.34368667  17.34241719 0.05653582 
  26.49290   17.7384      17.33443363  17.33310616 0.05637487 
  26.55000   17.0454      17.32516896  17.32377879 0.05866685 
  26.60700   17.866       17.31594031  17.31446776 0.05597224 
  26.66400   17.3372      17.30670497  17.30515673 0.05767944 
  26.72110   17.5271      17.29745765  17.29582937 0.0570545 
  26.77810   17.5201      17.28823375  17.28651834 0.0570773 
  26.83510   17.1303      17.279018    17.27720731 0.05837609 
  26.89220   17.1356      17.26979537  17.26787994 0.05835804 
  26.94920   17.1553      17.26059947  17.25856891 0.05829102 
  27.00620   17.3494      17.25141569  17.24925788 0.05763888 
  27.06330   17.1333      17.24222981  17.23993051 0.05836587 
  27.12030   17.4992      17.23307626  17.23061948 0.05714547 
  27.17730   17.6035      17.22394166  17.22130845 0.05680688 
  27.23440   17.2264      17.21481337  17.21198109 0.05805043 
  27.29140   17.3558      17.20572752  17.20267006 0.05761763 
  27.34840   16.9965      17.19667327  17.19335903 0.05883564 
  27.40550   16.7481      17.18764151  17.18403166 0.05970827 
  27.46250   17.1915      17.17867297  17.17472063 0.05816828 
  27.51950   16.4385      17.169766    17.1654096  0.0608328 
  27.57660   17.2204      17.16093333  17.15608223 0.05807066 
  27.63360   17.227       17.15227647  17.1467712  0.05804841 
  27.69060   17.4881      17.14396474  17.13746017 0.05718174 
  27.74770   16.5044      17.13648054  17.12813281 0.0605899 
  27.80470   17.2874      17.13103974  17.11882178 0.0578456 
  27.86170   17.1719      17.13016186  17.10951075 0.05823467 
  27.91880   17.2611      17.138541    17.10018338 0.05793374 
  27.97580   17.0157      17.16338754  17.09087235 0.05876925 
  28.03280   16.5891      17.21360959  17.08156132 0.06028055 
  28.08990   16.821       17.29683569  17.07223395 0.0594495 
  28.14690   17.138       17.41352592  17.06292292 0.05834987 
  28.20390   17.5169      17.55257829  17.05361189 0.05708773 
  28.26100   17.4645      17.68930622  17.04428453 0.05725901 
  28.31800   16.9571      17.78936092  17.0349735  0.05897235 
  28.37500   17.8979      17.82181021  17.02566247 0.05587248 
  28.43210   17.1181      17.77324914  17.0163351  0.0584177 
  28.48910   17.0538      17.65675754  17.00702407 0.05863796 
  28.54610   17.5216      17.50346443  16.99771304 0.05707241 
  28.60320   17.553       17.34733887  16.98838567 0.05697032 
  28.66020   16.9969      17.21473141  16.97907464 0.05883426 
  28.71720   17.3146      17.11873467  16.96976361 0.05775473 
  28.77430   16.9363      17.06292459  16.96043625 0.05904477 
  28.83130   17.1996      17.04842516  16.95112522 0.05814089 
  28.88830   17.1302      17.08013919  16.94181419 0.05837643 
  28.94540   17.0489      17.1701808   16.93248682 0.05865481 
  29.00240   17.1236      17.33320621  16.92317579 0.05839893 
  29.05940   16.7123      17.57680962  16.91386476 0.05983617 
  29.11650   16.8448      17.88795159  16.90453739 0.0593655 
  29.17350   16.7551      18.2215665   16.89522636 0.05968332 
  29.23050   16.9422      18.50738682  16.88591533 0.05902421 
  29.28760   17.1039      18.66746885  16.87658797 0.0584662 
  29.34460   16.7632      18.64862302  16.86727694 0.05965448 
  29.40160   17.1991      18.45430031  16.85796591 0.05814258 
  29.45870   17.3328      18.14049644  16.84863854 0.05769408 
  29.51570   17.1032      17.78699148  16.83932751 0.05846859 
  29.57270   17.2657      17.46181081  16.83001648 0.0579183 
  29.62980   17.6175      17.21278599  16.82857749 0.05676174 
  29.68680   17.5353      17.04328427  16.82780721 0.05702782 
  29.74380   18.0261      16.94056338  16.82703693 0.05547512 
  29.80090   17.7217      16.88456926  16.8262653  0.056428  
  29.85790   17.4107      16.85669874  16.82549502 0.05743594 
  29.91490   18.0108      16.84346663  16.82472474 0.05552224 
  29.97200   17.9722      16.83703739  16.82395311 0.05564149 
  30.02900   17.0239      16.83351076  16.82318283 0.05874095 
  30.08600   17.265       16.83115544  16.82241255 0.05792065 
  30.14310   16.8297      16.82929299  16.82164092 0.05941877 
  30.20010   17.1067      16.82768059  16.82087064 0.05845663 
  30.25710   16.6745      16.8262194   16.82010036 0.05997181 
  30.31420   16.58        16.82486556  16.81932873 0.06031363 
  30.37120   17.3581      16.82359996  16.81855845 0.05760999 
  30.42820   17.2366      16.82240375  16.81778817 0.05801608 
  30.48530   17.3427      16.82126261  16.81701654 0.05766115 
  30.54230   17.2188      16.82017087  16.81624626 0.05807606 
  30.59930   17.5394      16.8191188   16.81547598 0.05701449 
  30.65640   16.9095      16.81809843  16.81470434 0.05913835 
  30.71340   17.134       16.81710831  16.81393406 0.05836349 
  30.77040   16.9268      16.81614251  16.81316378 0.05907791 
  30.82750   17.1835      16.81519599  16.81239215 0.05819536 
  30.88450   16.9964      16.81426926  16.81162187 0.05883599 
  30.94150   17.3553      16.81335828  16.81085159 0.05761929 
  30.99860   16.9469      16.81247033  16.81007996 0.05900784 
  31.05560   16.8001      16.81158528  16.80930968 0.05952346 
  31.11260   17.0432      16.81071089  16.8085394  0.05867443 
  31.16970   16.7514      16.80984444  16.80776777 0.0596965 
  31.22670   17.1114      16.80898791  16.80699749 0.05844057 
  31.28370   17.1036      16.80813887  16.80622721 0.05846722 
  31.34080   17.2808      16.80729506  16.80545558 0.05786769 
  31.39780   17.5538      16.80645877  16.8046853  0.05696772 
  31.45480   16.8635      16.80562792  16.80391502 0.05929967 
  31.51190   17.1156      16.80480053  16.80314339 0.05842623 
  31.56890   17.3042      16.80397906  16.80237311 0.05778944 
  31.62590   17.9246      16.80316164  16.80160283 0.05578925 
  31.68300   17.2997      16.8023465   16.80083119 0.05780447 
  31.74000   17.317       16.80153616  16.80006091 0.05774672 
  31.79700   17.0543      16.80072894  16.79929063 0.05863624 
  31.85410   17.1914      16.79992337  16.798519   0.05816862 
  31.91110   17.0453      16.79912163  16.79774872 0.0586672 
  31.96810   17.6114      16.79832232  16.79697844 0.0567814 
  32.02520   17.195       16.79752387  16.79620681 0.05815644 
  32.08220   16.906       16.79672942  16.79543653 0.0591506 
  32.13920   18.0584      16.79593641  16.79466625 0.05537589 
  32.19630   17.5221      16.79514383  16.79389462 0.05707078 
  32.25330   17.5183      16.79435435  16.79312434 0.05708316 
  32.31030   17.5396      16.79356645  16.79235406 0.05701384 
  32.36740   16.9558      16.79277868  16.79158243 0.05897687 
  32.42440   16.9599      16.79199371  16.79081215 0.05896261 
  32.48140   16.7241      16.79121007  16.79004187 0.05979395 
  32.53850   16.7963      16.79042633  16.78927024 0.05953692 
  32.59550   17.1043      16.78964516  16.78849996 0.05846483 
  32.65250   16.3158      16.78886514  16.78772968 0.06129028 
  32.70960   16.3018      16.78808484  16.78695804 0.06134292 
  32.76660   16.5028      16.78730697  16.78618776 0.06059578 
  32.82360   16.4054      16.78653009  16.78541748 0.06095554 
  32.88070   16.2185      16.78575283  16.78464585 0.06165798 
  32.93770   16.4186      16.78497787  16.78387557 0.06090653 
  32.99470   16.4596      16.78420382  16.78310529 0.06075482 
  33.05180   16.1679      16.78342929  16.78233366 0.06185095 
  33.10880   16.5124      16.78265698  16.78156338 0.06056055 
  33.16580   16.5586      16.77181836  16.77072594 0.06039158 
  33.22290   16.486       16.75911843  16.75802637 0.06065753 
  33.27990   16.7683      16.74644156  16.74534905 0.05963634 
  33.33700   16.5592      16.73374325  16.73264948 0.06038939 
  33.39400   16.6101      16.72106798  16.71997215 0.06020433 
  33.45100   16.4977      16.7083935   16.70729482 0.06061451 
  33.50810   16.546       16.69569758  16.69459526 0.06043757 
  33.56510   16.3958      16.68302468  16.68191793 0.06099123 
  33.62210   16.2788      16.67035258  16.6692406  0.06142959 
  33.67920   16.7073      16.65765906  16.65654103 0.05985408 
  33.73620   16.2036      16.64498857  16.64386371 0.06171468 
  33.79320   16.0832      16.63231891  16.63118638 0.06217668 
  33.85030   16.4172      16.61962786  16.61848681 0.06091173 
  33.90730   16.0785      16.60695989  16.60580948 0.06219486 
  33.96430   16.5381      16.5942928   16.59313216 0.06046644 
  34.02140   16.1974      16.58160439  16.58043259 0.0617383 
  34.07840   16.5708      16.56893913  16.56775526 0.06034712 
  34.13540   16.3773      16.55627485  16.55507793 0.06106013 
  34.19250   16.6353      16.54358934  16.54237837 0.06011313 
  34.24950   16.2337      16.53092711  16.52970104 0.06160025 
  34.30650   16.8238      16.51826596  16.51702371 0.0594396 
  34.36360   16.2118      16.50558375  16.50432414 0.06168347 
  34.42060   16.6148      16.49292497  16.49164682 0.0601873 
  34.47760   16.2489      16.48026746  16.47896949 0.06154263 
  34.53470   16.2926      16.4675891   16.46626992 0.06137756 
  34.59170   16.0058      16.45493439  16.45359259 0.06247735 
  34.64870   15.7806      16.44228121  16.44091527 0.06336895 
  34.70580   16.6457      16.4296075   16.4282157  0.06007558 
  34.76280   16.3534      16.41695775  16.41553837 0.06114936 
  34.81980   16.3684      16.40430993  16.40286104 0.06109333 
  34.87690   16.3769      16.39164202  16.39016148 0.06106162 
  34.93390   15.8362      16.37899857  16.37748415 0.06314646 
  34.99090   16.1951      16.36635763  16.36480682 0.06174707 
  35.04800   16.2411      16.35369731  16.35210725 0.06157218 
  35.10500   16.3053      16.34106228  16.33942993 0.06132975 
  35.16200   16.5965      16.32843087  16.3267526  0.06025367 
  35.21910   16.2847      16.31578187  16.31405303 0.06140733 
  35.27610   16.2249      16.30316165  16.3013757  0.06163366 
  35.33310   15.8762      16.29055305  16.28869838 0.06298736 
  35.39020   15.9136      16.27794573  16.27599881 0.06283933 
  35.44720   16.3966      16.26540873  16.26332148 0.06098825 
  35.50420   16.2396      16.25296631  16.25064415 0.06157787 
  35.56130   15.7148      16.24067053  16.23794459 0.06363428 
  35.61830   15.5501      16.22865852  16.22526726 0.06430827 
  35.67530   15.3251      16.21699439  16.21258993 0.06525243 
  35.73240   16.0224      16.20568391  16.19989036 0.06241262 
  35.78940   15.9971      16.19467378  16.18721304 0.06251133 
  35.84640   15.7817      16.18370526  16.17453571 0.06336453 
  35.90350   16.2126      16.17240887  16.16183614 0.06168042 
  35.96050   15.7446      16.16047199  16.14915881 0.06351384 
  36.01750   16.372       16.14768444  16.13648149 0.06107989 
  36.07460   16.4291      16.13411044  16.12378192 0.06086761 
  36.13160   16.4429      16.12011173  16.11110459 0.06081652 
  36.18860   16.4257      16.10603668  16.09842726 0.06088021 
  36.24570   16.7022      16.09216207  16.0857277  0.05987235 
  36.30270   16.7162      16.07869933  16.07305037 0.05982221 
  36.35970   16.4081      16.065669    16.06037304 0.06094551 
  36.41680   16.7791      16.05300171  16.04767347 0.05959795 
  36.47380   16.7269      16.04075076  16.03499615 0.05978394 
  36.53080   16.4747      16.02903385  16.02231882 0.06069913 
  36.58790   16.5682      16.01827238  16.00961925 0.06035659 
  36.64490   16.8861      16.00947885  15.99694192 0.05922031 
  36.70190   16.9244      16.03484601  16.01465266 0.05908629 
  36.75900   17.7959      16.07618656  16.04153382 0.05619272 
  36.81600   16.5419      16.12854084  16.0683679  0.06045255 
  36.87300   16.2697      16.19720148  16.09520199 0.06146395 
  36.93010   16.3343      16.28722418  16.12208315 0.06122087 
  36.98710   16.4376      16.40044717  16.14891724 0.06083613 
  37.04410   16.6241      16.53336535  16.17575132 0.06015363 
  37.10120   16.5751      16.67448984  16.20263248 0.06033146 
  37.15820   16.0324      16.80407206  16.22946657 0.06237369 
  37.21520   17.0153      16.89968377  16.25630065 0.05877064 
  37.27230   16.6616      16.941991    16.28318181 0.06001825 
  37.32930   16.2119      16.92410994  16.3100159  0.06168308 
  37.38630   16.3274      16.85759946  16.33684998 0.06124674 
  37.44340   16.0626      16.76605734  16.36373114 0.06225642 
  37.50040   16.1845      16.674797    16.39056523 0.06178751 
  37.55740   16.301       16.60176515  16.41739931 0.06134593 
  37.61450   16.5122      16.55502711  16.44428047 0.06056128 
  37.67150   16.9629      16.53410517  16.47111456 0.05895218 
  37.72850   16.7537      16.53324596  16.49794864 0.05968831 
  37.78560   16.8459      16.54564286  16.5248298  0.05936163 
  37.84260   16.3911      16.56558871  16.55166389 0.06100872 
  37.89960   16.4558      16.58936585  16.57849797 0.06076885 
  37.95670   16.5616      16.61494857  16.60537914 0.06038064 
  38.01370   16.2167      16.64125167  16.63221322 0.06166483 
  38.07070   16.7682      16.66789756  16.6590473  0.05963669 
  38.12780   16.4797      16.69477583  16.68592847 0.06068072 
  38.18480   16.97        16.72172797  16.71276255 0.05892752 
  38.24180   16.5806      16.74878572  16.73959663 0.06031145 
  38.29890   17.3659      16.77599249  16.7664778  0.05758412 
  38.35590   16.9099      16.80325537  16.79331188 0.05913696 
  38.41290   16.6724      16.83062898  16.82014597 0.05997937 
  38.47000   17.0744      16.85817328  16.84702713 0.05856721 
  38.52700   17.6619      16.88580825  16.87386121 0.05661905 
  38.58400   16.945       16.91360465  16.9006953  0.05901446 
  38.64110   16.6406      16.94164232  16.92757646 0.06009399 
  38.69810   17.0082      16.96986626  16.95441054 0.05879517 
  38.75510   16.854       16.99839566  16.98124463 0.0593331 
  38.81220   16.653       17.02743173  17.00812579 0.06004924 
  38.86920   17.0316      17.05728545  17.03495987 0.05871439 
  38.92620   16.4852      17.08925895  17.06179396 0.06066047 
  38.98330   17.3613      17.12710989  17.08867512 0.05759937 
  39.04030   16.1874      17.18050754  17.1155092  0.06177644 
  39.09730   17.1199      17.27261328  17.14234329 0.05841156 
  39.15440   16.6247      17.45090109  17.16922445 0.06015146 
  39.21140   17.3544      17.79608439  17.19605853 0.05762227 
  39.26840   17.5587      18.42260181  17.22289262 0.05695182 
  39.32550   19.4071      19.4519815   17.24977378 0.05152753 
  39.38250   20.3253      20.94243571  17.27660787 0.04919977 
  39.43950   22.6229      22.81826963  17.30344195 0.044203  
  39.49660   23.8596      24.81555476  17.33032311 0.04191185 
  39.55360   26.0168      26.5006355   17.3571572  0.0384367 
  39.61060   26.6388      27.42684199  17.38399128 0.03753923 
  39.66770   26.5283      27.3153473   17.41087244 0.03769559 
  39.72470   25.4216      26.21079022  17.43770653 0.03933663 
  39.78170   23.5973      24.4548034   17.46454061 0.04237773 
  39.83880   21.8825      22.50561618  17.49142177 0.04569862 
  39.89580   20.058       20.76486967  17.51825586 0.04985542 
  39.95280   18.9163      19.44653138  17.54508994 0.05286446 
  40.00990   18.6527      18.5836473   17.5719711  0.05361154 
  40.06690   18.0265      18.09511699  17.59880519 0.05547389 
  40.12390   18.2852      17.85635573  17.62563927 0.05468904 
  40.18100   17.9274      17.76019634  17.65252043 0.05578054 
  40.23800   18.1296      17.70254377  17.6468761  0.05515841 
  40.29500   18.0248      17.66143497  17.62682432 0.05547912 
  40.35210   17.9802      17.63245952  17.60673737 0.05561673 
  40.40910   18.0258      17.60800093  17.5866856  0.05547604 
  40.46610   18.3865      17.58519409  17.56663382 0.05438773 
  40.52320   18.0353      17.56305937  17.54654687 0.05544682 
  40.58020   18.0851      17.54136012  17.5264951  0.05529414 
  40.63720   17.6016      17.51993604  17.50644332 0.05681302 
  40.69430   17.9872      17.49868801  17.48635637 0.05559509 
  40.75130   17.096       17.4776493   17.4663046  0.05849321 
  40.80830   17.4127      17.45675198  17.44625282 0.05742935 
  40.86540   17.2494      17.43593589  17.42616587 0.05797303 
  40.92240   17.8663      17.41525511  17.4061141  0.0559713 
  40.97940   17.2336      17.39465801  17.38606232 0.05802618 
  41.03650   17.3327      17.37409656  17.36597537 0.05769442 
  41.09350   17.3531      17.35363289  17.3459236  0.05762659 
  41.15050   17.4121      17.33322298  17.32587182 0.05743133 
  41.20760   17.7677      17.31282454  17.30578487 0.0562819 
  41.26460   16.7232      17.29250366  17.2857331  0.05979717 
  41.32160   17.4996      17.27222024  17.26568132 0.05714416 
  41.37870   17.7849      17.25193515  17.24559437 0.05622747 
  41.43570   17.3763      17.23171666  17.2255426  0.05754965 
  41.49270   17.4188      17.21152687  17.20549082 0.05740924 
  41.54980   17.6002      17.19132873  17.18540387 0.05681754 
  41.60680   17.9836      17.17119354  17.1653521  0.05560622 
  41.66380   16.846       17.15108142  17.14530032 0.05936127 
  41.72090   17.5561      17.13095858  17.12521337 0.05696026 
  41.77790   17.2859      17.11089558  17.1051616  0.05785062 
  41.83490   17.6886      17.09085813  17.08510982 0.05653359 
  41.89200   18.2171      17.07081119  17.06502287 0.05489348 
  41.94900   17.285       17.05082702  17.0449711  0.05785363 
  42.00600   17.3578      17.03087266  17.02491932 0.05761099 
  42.06310   17.5078      17.01091619  17.00483237 0.0571174 
  42.12010   17.2145      16.99103143  16.9847806  0.05809056 
  42.17710   17.6597      16.9711885   16.96472882 0.0566261 
  42.23420   17.3991      16.95135934  16.94464187 0.05747424 
  42.29120   17.4254      16.93162217  16.9245901  0.05738749 
  42.34820   17.5679      16.91195433  16.90453832 0.056922  
  42.40530   17.5653      16.89234011  16.88445137 0.05693043 
  42.46230   17.4596      16.87288339  16.8643996  0.05727508 
  42.51930   16.8963      16.85363127  16.84434782 0.05918456 
  42.57640   17.7184      16.83476191  16.82426087 0.0564385 
  42.63340   16.4299      16.81688064  16.8042091  0.06086464 
  42.69040   16.8702      16.80122659  16.78415732 0.05927612 
  42.74750   16.9486      16.79046813  16.76407037 0.05900192 
  42.80450   16.8655      16.7895626   16.7440186  0.05929264 
  42.86150   17.3207      16.80609953  16.72396682 0.05773439 
  42.91860   16.9127      16.84964114  16.70387987 0.05912716 
  42.97560   16.8751      16.92824073  16.6838281  0.05925891 
  43.03260   17.2549      17.04355786  16.66377632 0.05795455 
  43.08970   16.914       17.18525181  16.64368937 0.05912262 
  43.14670   16.785       17.32774176  16.6236376  0.059577  
  43.20370   16.9507      17.43574313  16.60358582 0.05899461 
  43.26080   16.8166      17.47473878  16.58349887 0.05946505 
  43.31780   16.7606      17.42809438  16.5634471  0.05966374 
  43.37480   16.4739      17.30914142  16.54339532 0.06070208 
  43.43190   16.6108      17.15330108  16.52330837 0.0602018 
  43.48890   16.7585      17.00163652  16.5032566  0.05967121 
  43.54590   17.0335      16.88458236  16.48320482 0.05870784 
  43.60300   16.9683      16.81541573  16.46311787 0.05893342 
  43.66000   16.4838      16.7898706   16.4430661  0.06066562 
  43.71700   17.094       16.79053806  16.42301433 0.05850006 
  43.77410   16.9195      16.81645565  16.42408941 0.0591034 
  43.83110   17.1886      16.84082697  16.43837323 0.05817809 
  43.88810   16.8832      16.84040482  16.45265705 0.05923048 
  43.94520   17.254       16.81422789  16.46696594 0.05795758 
  44.00220   17.4869      16.7692121   16.48124976 0.05718566 
  44.05920   16.9048      16.71668541  16.49553358 0.0591548 
  44.11630   16.908       16.66762881  16.50984246 0.0591436 
  44.17330   17.338       16.62959986  16.52412629 0.05767678 
  44.23030   16.9954      16.60538777  16.53841011 0.05883945 
  44.28740   16.8403      16.59421249  16.55271899 0.05938136 
  44.34440   16.3402      16.59328758  16.56700282 0.06119876 
  44.40140   16.4489      16.59927622  16.58128664 0.06079434 
  44.45850   16.3327      16.60940648  16.59559552 0.06122686 
  44.51550   16.2261      16.62172085  16.60987935 0.0616291 
  44.57250   16.2815      16.6351164   16.62416317 0.0614194 
  44.62960   16.3492      16.64904801  16.63847205 0.06116507 
  44.68660   16.4483      16.66320963  16.65275588 0.06079656 
  44.74360   16.2217      16.67752105  16.6670397  0.06164582 
  44.80070   16.2232      16.69196931  16.68134858 0.06164012 
  44.85770   16.3653      16.70649173  16.6956324  0.0611049 
  44.91470   15.9999      16.72111234  16.70991623 0.06250039 
  44.97180   16.5051      16.73586162  16.72422511 0.06058733 
  45.02880   16.4655      16.75069682  16.73850893 0.06073305 
  45.08580   16.4469      16.76565704  16.75279276 0.06080173 
  45.14290   15.9086      16.7807881   16.76710164 0.06285908 
  45.19990   16.372       16.79606545  16.78138546 0.06107989 
  45.25690   16.3713      16.81156588  16.79566929 0.0610825 
  45.31400   16.4113      16.82743123  16.80997817 0.06093363 
  45.37100   16.3002      16.84391625  16.82426199 0.06134894 
  45.42800   16.0713      16.86192339  16.83854581 0.06222272 
  45.48510   16.1153      16.8838203   16.8528547  0.06205283 
  45.54210   16.0199      16.91507873  16.86713852 0.06242236 
  45.59910   16.5475      16.96728726  16.88142234 0.06043209 
  45.65620   16.5463      17.06130611  16.89573123 0.06043647 
  45.71320   16.8388      17.22758731  16.91001505 0.05938665 
  45.77020   16.9811      17.50235246  16.92429887 0.058889  
  45.82730   17.5662      17.9147728   16.93860776 0.05692751 
  45.88430   18.6431      18.46525026  16.95289158 0.05363915 
  45.94130   18.723       19.11493357  16.9671754  0.05341024 
  45.99840   20.1298      19.784551    16.98148428 0.04967759 
  46.05540   20.9173      20.37111843  16.99576811 0.04780732 
  46.11240   21.6413      20.78924842  17.01005193 0.04620794 
  46.16950   22.292       20.9957716   17.02436081 0.04485914 
  46.22650   23.6486      20.98853715  17.03864464 0.0422858 
  46.28350   23.0872      20.7836024   17.05292846 0.04331404 
  46.34060   22.9986      20.40001346  17.06723734 0.04348091 
  46.39760   21.2304      19.87834973  17.08152117 0.04710227 
  46.45460   20.6676      19.28752745  17.09580499 0.04838491 
  46.51170   18.9431      18.70687451  17.11011387 0.05278967 
  46.56870   18.8973      18.20444353  17.1243977  0.05291761 
  46.62570   18.2682      17.81694661  17.13868152 0.05473993 
  46.68280   17.773       17.55079086  17.1529904  0.05626512 
  46.73980   16.9874      17.38959958  17.16727422 0.05886716 
  46.79680   17.5256      17.30434164  17.18155805 0.05705939 
  46.85390   17.8429      17.26690416  17.19586693 0.0560447 
  46.91090   17.173       17.25611066  17.21015075 0.05823094 
  46.96790   16.9813      17.25850567  17.22443458 0.05888831 
  47.02500   16.8007      17.26692977  17.23874346 0.05952133 
  47.08200   17.3017      17.27798645  17.25302728 0.05779779 
  47.13900   17.2672      17.29031589  17.26731111 0.05791327 
  47.19610   17.2342      17.30352745  17.28161999 0.05802416 
  47.25310   17.2107      17.31769047  17.29590381 0.05810339 
  47.31010   17.3639      17.33743503  17.31421449 0.05759075 
  47.36720   17.3915      17.3633637   17.33601869 0.05749935 
  47.42420   17.6402      17.39361134  17.35778471 0.0566887 
  47.48120   17.1364      17.43012241  17.37955073 0.05835531 
  47.53830   16.9943      17.47434209  17.40135493 0.05884326 
  47.59530   17.3189      17.52575495  17.42312095 0.05774039 
  47.65230   17.509       17.58135107  17.44488697 0.05711348 
  47.70940   17.2901      17.63526582  17.46669118 0.05783657 
  47.76640   17.552       17.67969556  17.48845719 0.05697356 
  47.82340   17.3989      17.70816865  17.51022321 0.0574749 
  47.88050   17.0431      17.71866274  17.53202742 0.05867477 
  47.93750   16.7359      17.71503323  17.55379344 0.05975179 
  47.99450   17.5284      17.7046733   17.57555945 0.05705027 
  48.05160   17.108       17.69499853  17.59736366 0.05845219 
  48.10860   17.3317      17.69145517  17.61912968 0.05769774 
  48.16560   17.1017      17.69697922  17.64089569 0.05847372 
  48.22270   18.1161      17.71332019  17.6626999  0.05519952 
  48.27970   17.1655      17.74328716  17.68446592 0.05825639 
  48.33670   17.7146      17.79381381  17.70623194 0.05645061 
  48.39380   17.4194      17.87834057  17.72803614 0.05740726 
  48.45080   17.9649      18.01616176  17.74980216 0.0556641 
  48.50780   18.6786      18.22874945  17.77156818 0.0535372 
  48.56490   18.1219      18.52961545  17.79337238 0.05518185 
  48.62190   19.3309      18.90864161  17.8151384  0.05173065 
  48.67890   19.5494      19.3247485   17.83690442 0.05115247 
  48.73600   20.7634      19.70542656  17.85870862 0.04816167 
  48.79300   20.9765      19.96106094  17.88047464 0.0476724 
  48.85000   20.7817      20.02286209  17.90224066 0.04811926 
  48.90710   20.9032      19.87786606  17.92404486 0.04783957 
  48.96410   20.3851      19.57877012  17.94581088 0.04905544 
  49.02110   19.3738      19.2109716   17.9675769  0.0516161 
  49.07820   18.5668      18.85526095  17.9893811  0.05385958 
  49.13520   18.5063      18.56700635  18.01114712 0.05403565 
  49.19220   17.9449      18.36587415  18.03291314 0.05572614 
  49.24930   17.9698      18.24547783  18.05471735 0.05564892 
  49.30630   18.53        18.18647275  18.07648336 0.05396654 
  49.36330   18.0736      18.16721866  18.09824938 0.05532932 
  49.42040   18.1803      18.17132008  18.12005359 0.05500459 
  49.47740   17.7285      18.18895833  18.1418196  0.05640635 
  49.53440   18.0917      18.21571823  18.16358562 0.05527397 
  49.59150   17.3988      18.25040684  18.18538983 0.05747523 
  49.64850   17.4031      18.29251783  18.20715585 0.05746103 
  49.70550   18.0059      18.34072557  18.22892186 0.05553735 
  49.76260   17.7201      18.39164571  18.25072607 0.05643309 
  49.81960   18.0916      18.43955265  18.27249209 0.05527427 
  49.87660   18.1449      18.4782403   18.29425811 0.0551119 
  49.93370   18.0208      18.50322936  18.31606231 0.05549143 
  49.99070   18.1269      18.51440554  18.33782833 0.05516663 
  50.04770   17.8369      18.51638486  18.35959435 0.05606355 
  50.10480   18.3         18.51581267  18.38139855 0.05464481 
  50.16180   17.9475      18.51933309  18.40316457 0.05571807 
  50.21880   17.8913      18.53338595  18.42493059 0.05589309 
  50.27590   18.1541      18.56658286  18.44673479 0.05508398 
  50.33290   18.4268      18.63420467  18.46850081 0.05426878 
  50.38990   18.6561      18.76449677  18.49026683 0.05360177 
  50.44700   19.0812      19.00302928  18.51207103 0.05240761 
  50.50400   19.4819      19.40687506  18.53383705 0.0513297 
  50.56100   19.6203      20.0294667   18.55560307 0.05096762 
  50.61810   20.6022      20.8885785   18.57740727 0.04853851 
  50.67510   21.8615      21.92460087  18.59917329 0.04574252 
  50.73210   22.4341      22.99134638  18.62093931 0.044575  
  50.78920   24.0655      23.86898298  18.64274352 0.04155326 
  50.84620   24.4162      24.29937437  18.64131715 0.04095641 
  50.90320   23.9144      24.14272363  18.61286236 0.04181581 
  50.96030   23.0034      23.46718182  18.58435765 0.04347183 
  51.01730   22.2848      22.46940483  18.55590286 0.04487364 
  51.07430   20.9271      21.38627094  18.52744808 0.04778493 
  51.13140   20.2014      20.40944141  18.49894337 0.04950152 
  51.18840   19.6625      19.64926103  18.47048858 0.05085823 
  51.24540   19.3011      19.12486601  18.44203379 0.05181052 
  51.30250   18.7399      18.80151429  18.41352909 0.05336208 
  51.35950   18.7233      18.62892921  18.3850743  0.05340939 
  51.41650   18.8335      18.56815509  18.35661951 0.05309688 
  51.47360   18.9814      18.60906506  18.3281148  0.05268315 
  51.53060   18.817       18.76934585  18.29966002 0.05314343 
  51.58760   19.4294      19.08097958  18.27120523 0.05146839 
  51.64470   20.7415      19.5646646   18.24270052 0.04821252 
  51.70170   20.9267      20.1934552   18.21424573 0.04778584 
  51.75870   22.9598      20.87581568  18.18579095 0.04355439 
  51.81580   22.1418      21.46123204  18.15728624 0.04516345 
  51.87280   23.6648      21.78250542  18.12883145 0.04225685 
  51.92980   23.7838      21.73269246  18.10037666 0.04204543 
  51.98690   22.1605      21.31698348  18.07187196 0.04512534 
  52.04390   21.1288      20.65403033  18.04341717 0.04732876 
  52.10090   20.247       19.91012296  18.01496238 0.04939003 
  52.15800   19.282       19.23105755  17.98645767 0.05186184 
  52.21500   19.2309      18.70424014  17.95800289 0.05199965 
  52.27200   18.5974      18.34598793  17.9295481  0.05377096 
  52.32910   18.5412      18.12810336  17.90104339 0.05393394 
  52.38610   17.8539      18.0065406   17.8725886  0.05601017 
  52.44310   18.6807      17.93967457  17.84413382 0.05353118 
  52.50020   18.0689      17.89816525  17.81562911 0.05534371 
  52.55720   17.9168      17.86466231  17.78717432 0.05581354 
  52.61420   17.7378      17.83054527  17.75871953 0.05637678 
  52.67130   18.0702      17.79325043  17.73021483 0.05533973 
  52.72830   17.8092      17.75373686  17.70176004 0.05615075 
  52.78530   17.5111      17.7138582   17.67330525 0.05710664 
  52.84240   17.5006      17.67524087  17.64480054 0.0571409 
  52.89940   17.1036      17.63894115  17.61634576 0.05846722 
  52.95640   17.4627      17.60500828  17.58789097 0.05726491 
  53.01350   17.566       17.57298206  17.55938626 0.05692816 
  53.07050   17.5051      17.54238351  17.53093148 0.05712621 
  53.12750   17.3632      17.51262338  17.50247669 0.05759307 
  53.18460   17.6981      17.48327673  17.47397198 0.05650324 
  53.24160   17.8919      17.45422512  17.44551719 0.05589121 
  53.29860   17.5588      17.42530335  17.41706241 0.0569515 
  53.35570   17.4707      17.39640813  17.3885577  0.05723869 
  53.41270   17.3051      17.36761778  17.36010291 0.05778643 
  53.46970   17.448       17.33887228  17.33164812 0.05731316 
  53.52680   17.3481      17.3101191   17.30314342 0.0576432 
  53.58380   17.3058      17.28146449  17.27468863 0.0577841 
  53.64080   17.5238      17.25287759  17.24623384 0.05706525 
  53.69790   16.8469      17.22435648  17.21772913 0.0593581 
  53.75490   17.2497      17.19609988  17.18927435 0.05797202 
  53.81190   17.0215      17.16823364  17.16081956 0.05874923 
  53.86900   17.4819      17.14097984  17.13231485 0.05720202 
  53.92600   17.2762      17.11478116  17.10386006 0.0578831 
  53.98300   17.2094      17.08994924  17.07540528 0.05810778 
  54.04010   17.8211      17.06671661  17.04690057 0.05611326 
  54.09710   17.3054      17.0452403   17.01844578 0.05778543 
  54.15410   17.235       17.02527936  16.98999099 0.05802147 
  54.21120   17.1786      17.00628388  16.96148629 0.05821196 
  54.26820   16.6436      16.98750564  16.9330315  0.06008316 
  54.32520   17.0094      16.96793314  16.90457671 0.05879102 
  54.38230   17.1798      16.96822579  16.89787594 0.0582079 
  54.43930   17.1605      17.00008343  16.92599228 0.05827336 
  54.49630   16.7363      17.02736171  16.95410862 0.05975036 
  54.55340   16.7593      17.04956916  16.98227429 0.05966836 
  54.61040   16.9537      17.06761243  17.01039063 0.05898417 
  54.66740   16.871       17.08362258  17.03850697 0.05927331 
  54.72450   17.3895      17.09982818  17.06667264 0.05750597 
  54.78150   17.1863      17.11779875  17.09478898 0.05818588 
  54.83850   17.1513      17.1383209   17.12290533 0.05830462 
  54.89560   17.2444      17.16141428  17.15107099 0.05798984 
  54.95260   17.1363      17.18649112  17.17918734 0.05835565 
  55.00960   16.9293      17.21294166  17.20730368 0.05906919 
  55.06670   17.2063      17.24025541  17.23546935 0.05811825 
  55.12370   16.713       17.26795214  17.26358569 0.05983366 
  55.18070   16.8533      17.2958572   17.29170203 0.05933556 
  55.23780   17.1395      17.32390833  17.3198677  0.05834476 
  55.29480   17.2191      17.35195769  17.34798404 0.05807504 
  55.35180   16.9282      17.38003424  17.37610038 0.05907303 
  55.40890   16.8081      17.40817963  17.40426605 0.05949512 
  55.46590   16.7336      17.43629253  17.43238239 0.05976   
  55.52290   17.0549      17.46442159  17.46049874 0.05863418 
  55.58000   16.5731      17.4926171   17.4886644  0.06033874 
  55.63700   16.7541      17.52078298  17.51678075 0.05968688 
  55.69400   17.3033      17.54897356  17.54489709 0.05779244 
  55.75110   17.1021      17.57724589  17.57306276 0.05847235 
  55.80810   17.8336      17.60551014  17.6011791  0.05607393 
  55.86510   17.4616      17.63382396  17.62929544 0.05726852 
  55.92220   17.3166      17.66223984  17.65746111 0.05774806 
  55.97920   17.7614      17.69065133  17.68557745 0.05630187 
  56.03620   18.2297      17.71909019  17.71369379 0.05485554 
  56.09330   17.5435      17.74758094  17.74185946 0.05700117 
  56.15030   17.7024      17.77600061  17.7699758  0.05648952 
  56.20730   17.6721      17.80439292  17.79809215 0.05658637 
  56.26440   17.2642      17.83282819  17.82625782 0.05792333 
  56.32140   17.7252      17.86124778  17.85437416 0.05641685 
  56.37840   17.7659      17.8897511   17.8824905  0.05628761 
  56.43550   17.7693      17.91844584  17.91065617 0.05627684 
  56.49250   18.7002      17.94732616  17.93877251 0.05347536 
  56.54950   17.6567      17.97668549  17.96688885 0.05663572 
  56.60660   18.0311      18.00729773  17.99505452 0.05545973 
  56.66360   17.5648      18.04107038  18.02317086 0.05693205 
  56.72060   18.1776      18.08307668  18.0512872  0.05501276 
  56.77770   18.4089      18.14438565  18.07945287 0.05432155 
  56.83470   17.8311      18.24520597  18.10756921 0.05608179 
  56.89170   18.4145      18.41725961  18.13568556 0.05430503 
  56.94880   19.2601      18.69963024  18.16385123 0.05192081 
  57.00580   19.4276      19.12191985  18.19196757 0.05147316 
  57.06280   20.6788      19.68316892  18.22008391 0.04835871 
  57.11990   20.8252      20.32849988  18.24824958 0.04801875 
  57.17690   21.4454      20.94124199  18.27636592 0.04663005 
  57.23390   21.5405      21.37748113  18.30448226 0.04642418 
  57.29100   21.8481      21.51715001  18.33264793 0.04577057 
  57.34800   21.2387      21.32413456  18.36076427 0.04708386 
  57.40500   20.572       20.86842181  18.38888061 0.04860976 
  57.46210   19.6816      20.28456902  18.41704628 0.05080888 
  57.51910   19.0955      19.7146276   18.44516262 0.05236836 
  57.57610   18.8828      19.25346008  18.47327897 0.05295825 
  57.63320   18.5579      18.93647821  18.50144464 0.05388541 
  57.69020   18.8215      18.75239082  18.52956098 0.05313073 
  57.74720   18.7023      18.6648935   18.55767732 0.05346936 
  57.80430   17.8844      18.63675141  18.58584299 0.05591465 
  57.86130   18.692       18.64012018  18.61395933 0.05349882 
  57.91830   19.0532      18.64848324  18.632462   0.05248462 
  57.97540   18.5233      18.6412513   18.62928717 0.05398606 
  58.03240   17.9894      18.63644196  18.62611791 0.05558829 
  58.08940   18.5532      18.63275653  18.62294865 0.05389906 
  58.14650   18.8004      18.63002121  18.61977382 0.05319036 
  58.20350   18.8579      18.62868416  18.61660456 0.05302817 
  58.26050   18.2285      18.62961609  18.6134353  0.05485915 
  58.31760   18.7936      18.63397537  18.61026047 0.0532096 
  58.37460   19.3782      18.6427841   18.60709121 0.05160438 
  58.43160   19.2         18.65633493  18.60392195 0.05208333 
  58.48870   19.0156      18.67349998  18.60074712 0.0525884 
  58.54570   18.8939      18.69125588  18.59757786 0.05292714 
  58.60270   18.9896      18.70520214  18.5944086  0.0526604 
  58.65980   19.3793      18.71066798  18.59123377 0.05160145 
  58.71680   19.0924      18.70481675  18.58806451 0.05237686 
  58.77380   18.8347      18.68851603  18.58489525 0.05309349 
  58.83090   18.7314      18.66563994  18.58172042 0.05338629 
  58.88790   19.3957      18.64104581  18.57855116 0.05155782 
  58.94490   18.2838      18.61856444  18.5753819  0.05469323 
  59.00200   18.6742      18.60032676  18.57220707 0.05354982 
  59.05900   18.6532      18.58683641  18.56903781 0.0536101 
  59.11600   18.5435      18.57733662  18.56586855 0.05392725 
  59.17310   18.7176      18.57064835  18.56269372 0.05342565 
  59.23010   19.0332      18.56569694  18.55952446 0.05253977 
  59.28710   18.7334      18.56167907  18.5563552  0.05338059 
  59.34420   18.7451      18.55811557  18.55318037 0.05334727 
  59.40120   18.739       18.5547748   18.55001111 0.05336464 
  59.45820   18.7063      18.55153962  18.54684185 0.05345793 
  59.51530   18.5229      18.54835956  18.54366702 0.05398723 
  59.57230   18.7062      18.54522924  18.54049776 0.05345821 
  59.62930   18.4627      18.54213797  18.5373285  0.05416326 
  59.68640   18.7548      18.53908007  18.53415367 0.05331968 
  59.74340   18.9367      18.53606842  18.53098441 0.05280751 
  59.80040   18.9616      18.5331019   18.52781515 0.05273817 
  59.85750   18.6122      18.5301822   18.52464032 0.0537282 
  59.91450   18.7281      18.52733096  18.52147106 0.0533957 
  59.97150   18.1299      18.52456511  18.5183018  0.0551575 
  60.02860   18.2781      18.52193078  18.51512697 0.05471028 
  60.08560   18.3976      18.51956208  18.51195771 0.05435492 
  60.14260   18.9538      18.51775598  18.50878845 0.05275987 
  60.19970   18.4606      18.51718848  18.50561362 0.05416942 
  60.25670   18.7519      18.51921245  18.50244436 0.05332793 
  60.31370   19.086       18.52616855  18.4992751  0.05239443 
  60.37080   18.596       18.54151991  18.49610027 0.05377501 
  60.42780   18.993       18.56919324  18.49293101 0.05265098 
  60.48480   19.0844      18.61225201  18.48976175 0.05239882 
  60.54190   18.818       18.67064235  18.48658692 0.05314061 
  60.59890   18.5454      18.73865721  18.48341766 0.05392173 
  60.65590   18.7652      18.80490958  18.4802484  0.05329013 
  60.71300   18.5764      18.85391726  18.47707357 0.05383174 
  60.77000   18.2722      18.87078854  18.47390431 0.05472795 
  60.82700   18.8408      18.84931847  18.47073505 0.0530763 
  60.88410   18.6473      18.79583969  18.46756022 0.05362707 
  60.94110   18.9262      18.72560452  18.46439096 0.05283681 
  60.99810   18           18.65493279  18.4612217  0.05555556 
  61.05520   18.6495      18.59704909  18.45804687 0.05362074 
  61.11220   18.823       18.56120191  18.45487761 0.05312649 
  61.16920   18.8238      18.55335374  18.45170834 0.05312424 
  61.22630   18.7787      18.57887375  18.44853352 0.05325182 
  61.28330   18.8109      18.64283111  18.44536426 0.05316067 
  61.34030   18.7056      18.74789549  18.44219499 0.05345993 
  61.39740   19.274       18.88968809  18.43902017 0.05188337 
  61.45440   18.6935      19.04917053  18.43395383 0.05349453 
  61.51140   18.9094      19.19266951  18.42256872 0.05288375 
  61.56850   18.7595      19.28950783  18.41116363 0.05330632 
  61.62550   18.8207      19.30714666  18.39977851 0.05313299 
  61.68250   18.5972      19.23600146  18.3883934  0.05377154 
  61.73960   18.5574      19.09507297  18.37698831 0.05388686 
  61.79660   18.7671      18.92052757  18.3656032  0.05328474 
  61.85360   18.8636      18.74723253  18.35421808 0.05301215 
  61.91070   18.2227      18.59928916  18.34281299 0.05487661 
  61.96770   18.8136      18.48765492  18.33142788 0.05315304 
  62.02470   18.3842      18.4108008   18.32004276 0.05439453 
  62.08180   18.0064      18.36094803  18.30863767 0.05553581 
  62.13880   18.3225      18.32913732  18.29725256 0.05457771 
  62.19580   18.903       18.30782468  18.28586744 0.05290166 
  62.25290   18.8475      18.29225532  18.27446236 0.05305743 
  62.30990   18.1835      18.28024377  18.26307724 0.05499491 
  62.36690   18.7411      18.27146377  18.25169213 0.05335866 
  62.42400   18.8725      18.26707287  18.24028704 0.05298715 
  62.48100   18.5211      18.26923719  18.22890192 0.05399247 
  62.53800   17.9168      18.28031752  18.21751681 0.05581354 
  62.59510   18.8187      18.30171177  18.20611172 0.05313863 
  62.65210   18.2805      18.33212243  18.1947266  0.0547031 
  62.70910   18.7464      18.3666436   18.18334149 0.05334358 
  62.76620   18.1828      18.39678904  18.1719364  0.05499703 
  62.82320   18.3153      18.41210894  18.16055128 0.05459916 
  62.88020   18.4273      18.40445908  18.14916617 0.05426731 
  62.93730   18.2361      18.37243011  18.13776108 0.05483629 
  62.99430   18.3981      18.32263365  18.12637597 0.05435344 
  63.05130   18.3848      18.26519228  18.11499085 0.05439276 
  63.10840   17.8865      18.20939154  18.10358576 0.05590809 
  63.16540   18.2321      18.1615602   18.09220065 0.05484832 
  63.22240   18.183       18.1238806   18.08081553 0.05499643 
  63.27950   18.0899      18.09556128  18.06941044 0.05527947 
  63.33650   18.4881      18.07441107  18.05802533 0.05408885 
  63.39350   18.3043      18.05786782  18.04664021 0.05463197 
  63.45060   18.4304      18.04392739  18.03523512 0.05425818 
  63.50760   18.4702      18.0313641   18.02385001 0.05414127 
  63.56460   18.4929      18.01945994  18.01246489 0.05407481 
  63.62170   17.9991      18.00787853  18.00105981 0.05555833 
  63.67870   18.3993      17.99656513  17.98967469 0.05434989 
  63.73570   18.2466      17.98556423  17.97828958 0.05480473 
  63.79280   18.2038      17.97511712  17.96688449 0.05493359 
  63.84980   18.0249      17.96582994  17.95549937 0.05547881 
  63.90680   17.6764      17.95871793  17.94411426 0.05657261 
  63.96390   18.291       17.95536278  17.93270917 0.0546717 
  64.02090   18.1195      17.95774883  17.92132405 0.05518916 
  64.07790   17.8701      17.9676324   17.90993894 0.0559594 
  64.13500   17.8959      17.98562919  17.89853385 0.05587872 
  64.19200   18.0224      18.00999708  17.88714874 0.05548651 
  64.24900   17.2003      18.03627727  17.87576362 0.05813852 
  64.30610   17.655       18.05767309  17.86435853 0.05664118 
  64.36310   17.9634      18.06666525  17.85297342 0.05566875 
  64.42010   17.6411      18.05850292  17.8415883  0.05668581 
  64.47720   17.6396      18.03362373  17.83018321 0.05669063 
  64.53420   17.193       17.99680615  17.8187981  0.05816321 
  64.59120   17.5116      17.95379988  17.80741298 0.057105  
  64.64830   17.5147      17.9096545   17.79600789 0.0570949 
  64.70530   17.6678      17.86844628  17.78462278 0.05660014 
  64.76230   17.9004      17.83244322  17.77323766 0.05586467 
  64.81940   17.9133      17.80233306  17.76183258 0.05582444 
  64.87640   18.0164      17.77782632  17.75044746 0.05550498 
  64.93340   17.8557      17.75788772  17.73906235 0.05600453 
  64.99050   17.8393      17.7479612   17.73428776 0.05605601 
  65.04750   17.635       17.77667133  17.76581271 0.05670542 
  65.10450   17.6495      17.80684331  17.79733767 0.05665883 
  65.16160   17.7739      17.83793261  17.82891793 0.05626227 
  65.21860   17.8628      17.86946711  17.86044288 0.05598226 
  65.27560   17.2926      17.9013178   17.89196784 0.0578282 
  65.33270   17.9274      17.93348868  17.9235481  0.05578054 
  65.38970   17.3726      17.96593893  17.95507306 0.05756191 
  65.44670   17.5744      17.99899444  17.98659801 0.05690095 
  65.50380   17.7656      18.03339024  18.01817827 0.05628856 
  65.56080   17.3124      18.07046807  18.04970323 0.05776207 
  65.61780   17.841       18.11307178  18.08122818 0.05605067 
  65.67490   18.3286      18.16588405  18.11280844 0.05455954 
  65.73190   19.0913      18.23499228  18.1443334  0.05237988 
  65.78890   19.6544      18.32707159  18.17585835 0.05087919 
  65.84600   18.6749      18.4462837   18.20743861 0.05354781 
  65.90300   18.5923      18.58954048  18.23896357 0.05378571 
  65.96000   19.2334      18.74470683  18.27048852 0.05199289 
  66.01710   19.8198      18.88998122  18.30206878 0.0504546 
  66.07410   19.3534      18.99754879  18.33359374 0.05167051 
  66.13110   19.1849      19.04504657  18.36511869 0.05212433 
  66.18820   19.4778      19.0273227   18.39669895 0.0513405 
  66.24520   19.1584      18.96061315  18.42822391 0.05219643 
  66.30220   19.1957      18.87194139  18.45974886 0.052095  
  66.35930   19.1639      18.78701332  18.49132912 0.05218145 
  66.41630   19.2093      18.7243136   18.52285408 0.05205812 
  66.47330   19.3887      18.69276743  18.55437903 0.05157643 
  66.53040   19.5081      18.694943    18.58595929 0.05126076 
  66.58740   19.4097      18.73107516  18.61748425 0.05152063 
  66.64440   18.5179      18.80278656  18.6490092  0.0540018 
  66.70150   19.2275      18.91501228  18.68058946 0.05200884 
  66.75850   19.7763      19.07482292  18.71211442 0.05056558 
  66.81550   18.8925      19.29068213  18.74363937 0.05293106 
  66.87260   19.8278      19.56861782  18.77521963 0.05043424 
  66.92960   20.2889      19.90402324  18.80674459 0.04928803 
  66.98660   20.6033      20.27766573  18.83826954 0.04853591 
  67.04370   20.6515      20.65073594  18.8698498  0.04842263 
  67.10070   20.5351      20.96391548  18.90137476 0.04869711 
  67.15770   21.0239      21.15195359  18.93289971 0.04756491 
  67.21480   20.3416      21.16432279  18.96447997 0.04916034 
  67.27180   20.5158      20.99328616  18.99600493 0.04874292 
  67.32880   21.2398      20.68330564  19.02752988 0.04708142 
  67.38590   20.0257      20.31068572  19.05911015 0.04993583 
  67.44290   19.784       19.95495118  19.0906351  0.0505459 
  67.49990   19.7748      19.66916894  19.12216005 0.05056941 
  67.55700   19.9266      19.47306546  19.15374032 0.05018418 
  67.61400   19.821       19.36008807  19.18526527 0.05045154 
  67.67100   19.1912      19.30900021  19.21679022 0.05210722 
  67.72810   19.0739      19.29749811  19.24837049 0.05242766 
  67.78510   19.1804      19.30821342  19.27989544 0.05213656 
  67.84220   19.2643      19.33009114  19.3114757  0.05190949 
  67.89920   18.9279      19.35702114  19.34300066 0.05283206 
  67.95620   19.1551      19.38613872  19.37452561 0.05220542 
  68.01330   19.4783      19.41624003  19.40610587 0.05133918 
  68.07030   18.7491      19.44671237  19.43763083 0.05333589 
  68.12730   19.8135      19.47741034  19.46915578 0.05047064 
  68.18440   19.2962      19.50830757  19.50073604 0.05182368 
  68.24140   19.5486      19.53925793  19.532261   0.05115456 
  68.29840   19.6577      19.57029363  19.56378595 0.05087065 
  68.35550   19.8967      19.60145436  19.59536621 0.05025959 
  68.41250   19.3161      19.63261986  19.62689117 0.05177028 
  68.46950   18.7334      19.663836    19.65841612 0.05338059 
  68.52660   19.5142      19.69114881  19.68599432 0.05124473 
  68.58360   19.2389      19.67122917  19.66630112 0.05197802 
  68.64060   19.7929      19.65134372  19.64660793 0.05052317 
  68.69770   19.2814      19.63145432  19.62688019 0.05186345 
  68.75470   19.3634      19.61162814  19.60718699 0.05164382 
  68.81170   19.0385      19.59182845  19.5874938  0.05252515 
  68.86880   19.8991      19.57201929  19.56776605 0.05025353 
  68.92580   18.8694      19.55226936  19.54807286 0.05299586 
  68.98280   18.9176      19.53254377  19.52837966 0.05286083 
  69.03990   19.4323      19.51280839  19.50865192 0.05146071 
  69.09690   19.3206      19.49313331  19.48895873 0.05175823 
  69.15390   19.6048      19.47348557  19.46926553 0.05100792 
  69.21100   19.0161      19.45383318  19.44953779 0.05258702 
  69.26800   18.8221      19.43424826  19.42984459 0.05312903 
  69.32500   19.3531      19.41470082  19.4101514  0.05167131 
  69.38210   19.5734      19.39516256  19.39042366 0.05108974 
  69.43910   19.087       19.37570976  19.37073046 0.05239168 
  69.49610   19.1608      19.35631923  19.35103727 0.05218989 
  69.55320   19.2554      19.33697405  19.33130952 0.05193348 
  69.61020   19.4518      19.31777319  19.31161633 0.05140912 
  69.66720   19.2761      19.29875082  19.29192314 0.05187771 
  69.72430   19.3963      19.28003857  19.27219539 0.05155622 
  69.78130   19.1992      19.26209415  19.2525022  0.0520855 
  69.83830   19.365       19.24575578  19.232809   0.05163956 
  69.89540   19.4689      19.23274741  19.21308126 0.05136397 
  69.95240   19.1716      19.22616421  19.19338807 0.05216049 
  70.00940   18.8901      19.23050299  19.17369487 0.05293778 
  70.06650   19.1744      19.25120711  19.15396713 0.05215287 
  70.12350   19.3515      19.29265993  19.13427393 0.05167558 
  70.18050   19.4405      19.35542757  19.11458074 0.05143901 
  70.23760   19.4374      19.43336678  19.094853   0.05144721 
  70.29460   19.4869      19.51173988  19.0751598  0.05131653 
  70.35160   19.732       19.56985057  19.05546661 0.0506791 
  70.40870   19.7831      19.58632881  19.03573886 0.0505482 
  70.46570   19.2395      19.54935117  19.01604567 0.0519764 
  70.52270   20.0853      19.46482824  18.99635248 0.04978766 
  70.57980   19.7767      19.35182903  18.97662473 0.05056455 
  70.63680   19.5549      19.23281861  18.95693154 0.05113808 
  70.69380   19.5433      19.12487815  18.93723834 0.05116843 
  70.75090   19.226       19.03725355  18.9175106  0.0520129 
  70.80790   19.4169      18.97193784  18.89781741 0.05150153 
  70.86490   19.017       18.92526081  18.87812421 0.05258453 
  70.92200   19.4521      18.89154488  18.85839647 0.05140833 
  70.97900   19.1581      18.86544268  18.83870327 0.05219724 
  71.03600   19.0844      18.84275894  18.81901008 0.05239882 
  71.09310   19.3857      18.82084899  18.79928234 0.05158442 
  71.15010   18.9817      18.79863123  18.77958914 0.05268232 
  71.20710   19.4996      18.77594014  18.75989595 0.0512831 
  71.26420   19.0016      18.75309313  18.7401682  0.05262715 
  71.32120   19.4267      18.73062259  18.72047501 0.05147555 
  71.37820   19.2884      18.70886661  18.70078181 0.05184463 
  71.43530   19.7247      18.68807412  18.68105407 0.05069786 
  71.49230   19.4843      18.66856613  18.66136088 0.05132337 
  71.54930   19.4554      18.65055222  18.64166768 0.05139961 
  71.60640   19.3715      18.63417933  18.62193994 0.05162223 
  71.66340   19.5642      18.61940517  18.60224674 0.05111377 
  71.72040   20.0926      18.60560774  18.58255355 0.04976957 
  71.77750   18.6402      18.59161257  18.56282581 0.05364749 
  71.83450   19.5191      18.57600352  18.54313261 0.05123187 
  71.89150   19.5217      18.55750817  18.52343942 0.05122505 
  71.94860   19.3309      18.53565303  18.50371167 0.05173065 
  72.00560   19.685       18.51114368  18.48401848 0.0508001 
  72.06260   19.4103      18.48527595  18.46432529 0         
  72.11970   20.0977      0            0           0         
  72.17670   20.0005      0            0           0         
  72.23370   19.595       0            0           0         
  72.29080   19.942       0            0           0         
  72.34780   19.8789      0            0           0         
  72.40480   20.4733      0            0           0         
  72.46190   19.5419      0            0           0         
  72.51890   19.456       0            0           0         
  72.57590   19.7493      0            0           0         
  72.63300   19.3589      0            0           0         
  72.69000   20.213       0            0           0         
  72.74700   19.3844      0            0           0         
  72.80410   19.3447      0            0           0         
  72.86110   19.5352      0            0           0         
  72.91810   19.5889      0            0           0         
  72.97520   19.2096      0            0           0         
  73.03220   19.8423      0            0           0         
  73.08920   18.5414      0            0           0         
  73.14630   19.1721      0            0           0         
  73.20330   19.0443      0            0           0         
  73.26030   19.0988      0            0           0         
  73.31740   18.5974      0            0           0         
  73.37440   19.0754      0            0           0         
  73.43140   18.8135      0            0           0         
  73.48850   19.3373      0            0           0         
  73.54550   19.0759      0            0           0         
  73.60250   18.9262      0            0           0         
  73.65960   18.8929      0            0           0         
  73.71660   18.0153      0            0           0         
  73.77360   18.1453      0            0           0         
  73.83070   18.7791      0            0           0         
  73.88770   18.0495      0            0           0         
  73.94470   18.0946      0            0           0         
  74.00180   18.259       0            0           0         
  74.05880   17.8998      0            0           0         
  74.11580   17.6762      0            0           0         
  74.17290   17.644       0            0           0         
  74.22990   16.6286      0            0           0         
  74.28690   17.4141      0            0           0         
  74.34400   16.9762      0            0           0         
  74.40100   17.7706      0            0           0         
  74.45800   17.4563      0            0           0         
  74.51510   17.1506      0            0           0         
  74.57210   16.7841      0            0           0         
  74.62910   16.909       0            0           0         
  74.68620   16.962       0            0           0         
  74.74320   17.0538      0            0           0         
  74.80020   16.6054      0            0           0         
  74.85730   16.9395      0            0           0         
  74.91430   17.3787      0            0           0         
  74.97130   16.8765      0            0           0         
  75.02840   16.6034      0            0           0         
  75.08540   16.6948      0            0           0         
  75.14240   17.4669      0            0           0         
  75.19950   16.7685      0            0           0         
  75.25650   16.3255      0            0           0         
  75.31350   16.9036      0            0           0         
  75.37060   16.4191      0            0           0         
  75.42760   16.5962      0            0           0         
  75.48460   16.1273      0            0           0         
  75.54170   16.8389      0            0           0         
  75.59870   16.4668      0            0           0         
#--eof--eof--eof--eof--eof--eof--eof--eof--eof--eof--eof--eof--eof--eof--eof--#
